# Supplementary material
Source: PubMed Central journal article supplement (PMC5486987)
Supplement: NIHMS862927-supplement-Supplement.pdf [file NIHMS862927-supplement-Supplement.pdf]

## Supplementary Material\*

Falade-Nwulia O, Suarez-Cuervo C, Nelson DR, Fried MW, Segal JB, Sulkowski MS. Oral direct-acting agent therapy for hepatitis C virus infection. A systematic review. *Ann Intern Med*. doi:10.7326/M16-2575

Table 1. Summary of clinical trial outcomes by oral DAA regimen

Table 2. Follow up and adverse event summary table by clinical trial and oral DAA regimen

Table 3. Study characteristics and outcomes for HCV genotype 1 infection by clinical trial

Table 4. Study characteristics and outcomes for HCV genotypes 2-4 infection by clinical trial

Table 5. Study characteristics and outcomes for HCV genotypes 5 and 6 infection by clinical trial

Table 6. Study characteristics and outcomes for subpopulations by clinical trial

Table 7. Ongoing and future hepatitis C oral DAA clinical trials

Table 8. Risk of bias assessment based on the Cochrane Risk of Bias tool for Randomized Controlled Trials

Table 9: Risk of bias assessment based on Cochrane tool for assessment of the risk of bias in nonrandomized trials and observational studies

\* This supplementary material was provided by the authors to give readers further details on their article. The material was reviewed but not copyedited.

**Table 1. Summary of clinical trial outcomes by oral DAA regimen**

| Study, Author, Year, Country                                                   | Target population                                                                                      | Study design                                                                                       | DAA Regimen                                                                                                                                                                                                                      | Summary of results                                                                                                                                                                                                                                                                                                                                  | ROB               |
|--------------------------------------------------------------------------------|--------------------------------------------------------------------------------------------------------|----------------------------------------------------------------------------------------------------|----------------------------------------------------------------------------------------------------------------------------------------------------------------------------------------------------------------------------------|-----------------------------------------------------------------------------------------------------------------------------------------------------------------------------------------------------------------------------------------------------------------------------------------------------------------------------------------------------|-------------------|
| <b>C-WORTHY<br/>NCT 01717326</b><br><br><b>Lawitz<br/>Lancet 2015</b>          | HCV 1<br>Treatment naïve or experienced (null responder)<br>With and without cirrhosis                 | RCT<br>Open label<br>Phase 2<br>Multicenter<br><br>Total ( N=471)<br>Lawitz= 253<br>Sulkowski= 218 | Treatment naïve with cirrhosis<br>GZP/EBV 12w<br>GZP/EBV + RBV 12w<br>GZP/EBV 18w<br>GZP/EBV + RBV 18w<br><br>Treatment experienced w/without cirrhosis<br>GZP/EBV 12w<br>GZP/ EBV + RBV 12w<br>GZP/EBV 18w<br>GZP/EBV + RBV 18w | GZP/EBV for 12 weeks achieved high SVR rates in GT1 infected treatment naïve patients with cirrhosis (>90%) and treatment experienced patients without cirrhosis (>94%). The addition of RBV or extension of treatment did not significantly increase SVR rates but it did increase the risk of AEs.                                                | Moderate (Merck)  |
| <b>Sulkowski<br/>Lancet 2015</b>                                               | HCV 1,<br>Treatment naïve<br>Without cirrhosis.<br>With and without HIV coinfection                    |                                                                                                    | Monoinfected<br>GZP/EBV +RBV 8w<br>GZP/EBV +RBV 12w<br>GZP/ EBV 12w<br><br>HIV Coinfected<br>GZP/ EBV +RBV 12w<br>GZP/ EBV 12w                                                                                                   | GZP/EBV for 12 weeks achieved higher SVR rates than an 8 week regimen in monoinfected patients (93% vs 80%). In HIV co-infected patients without cirrhosis, the addition of RBV yielded higher SVR rates (97 vs 87%). Treatment was in general safe and did not interfere with permissible antiretrovirals.                                         | Low (Merck)       |
| <b>C-EDGE<br/>NCT 02105467</b><br><br><b>Zeuzem<br/>Annals 2015</b>            | HCV 1, 4, & 6<br>Treatment naïve<br>With and without cirrhosis                                         | RCT<br>Phase 3<br><br>Total ( N= 639)<br>Zeuzem= 421                                               | GZP/EBV 12w<br>Placebo + Deferred treatment<br><br>GZP/EBV 12w                                                                                                                                                                   | GZP/EBV for 12 weeks achieved high SVR rates (>92%) across multiple HCV genotypes in treatment naïve patients, with and without cirrhosis. Treatment was well tolerated.                                                                                                                                                                            | Moderate (Merck)  |
| <b>Rockstroh<br/>Lancet 2015</b>                                               | HCV 1-4-6*<br>Treatment naïve<br>With and without cirrhosis.<br>With and without HIV coinfection       | Rockstroh<br>Open label<br>Single arm<br>(N= 218)                                                  |                                                                                                                                                                                                                                  | GZP/EBV for 12 weeks achieved high SVR rates (96%) across multiple HCV genotypes in HIV co-infected, treatment naïve, patients with and without cirrhosis. Treatment was well tolerated.                                                                                                                                                            | Moderate (Merck)  |
| <b>C-EDGE TE<br/>NCT02105701</b><br><b>Kwo<br/>Gastroenterology 2016</b>       | HCV 1, 4, & 6<br>Treatment experienced<br>With and without cirrhosis<br>With and without HIV infection | RCT<br>Phase 3<br>Open label<br><br>Total N=420                                                    | GZP/EBV 12w<br>GZP/EBV +RBV 12w<br>GZP/ EBV 16w<br>GZP/EBV +RBV 16w                                                                                                                                                              | GZP/EBV for 12 or 16 weeks achieved similar SVR (92.4%) across multiple HCV genotypes in treatment experienced, HIV uninfected and co-infected patients with and without cirrhosis. The addition of ribavirin and prolongation of therapy to 16 weeks increased SVR to 98.1% but was associated with increased rates of anemia, fatigue and nausea. | Low (Merck)       |
| <b>C-SURFER<br/>NCT 02092350</b><br><b>Roth<br/>Lancet 2015</b>                | HCV 1<br>Treatment naïve<br>CKD stage 4-5                                                              | RCT Phase 3<br>(N= 226)<br>Multi Center US                                                         | GZP/EBV 12w<br>Placebo + Deferred treatment                                                                                                                                                                                      | GZP/EBV for 12 weeks achieved high SVR rates among HCV1 infected, treatment naïve patients with CKD stage 4 and 5. Treatment was well tolerated.                                                                                                                                                                                                    | Low (Merck)       |
| <b>Pearl 1<br/>NCT 01685203</b><br><br><b>Lawitz<br/>Gastroenterology 2015</b> | HCV 1b<br>Treatment naïve or experienced<br>With and without cirrhosis                                 | RCT<br>Phase 2b<br>Open label<br><br>Total N=270<br>HCV1b=181                                      | Without cirrhosis<br>TN: PTV/r/OBV + RBV 12w<br>TE: PTV/r/OBV + RBV 12w<br>With cirrhosis<br>TN: PTV/r/OBV + RBV 24w<br>TE: PTV/r/OBV + RBV 24w                                                                                  | PTV/r/OBV/DAV + RBV achieved high SVR rates in HCV 1b infection with or without cirrhosis including treatment naïve (98% and 95%) and treatment experienced (96% and 90%) patients. Treatment was well tolerated.                                                                                                                                   | Moderate (AbbVie) |

|                                                                              |                                                                  |                                                                       |                                                                             |                                                                                                                                                                                                                                                                                            |                                         |
|------------------------------------------------------------------------------|------------------------------------------------------------------|-----------------------------------------------------------------------|-----------------------------------------------------------------------------|--------------------------------------------------------------------------------------------------------------------------------------------------------------------------------------------------------------------------------------------------------------------------------------------|-----------------------------------------|
| <b>Hezode<br/>Lancet 2015</b>                                                | HCV 4<br>Treatment naïve or<br>experienced<br>Without cirrhosis  | HCV4<br>(N=135)<br>Multicenter                                        | TN: PTV/r/OBV 12 w<br>TN : PTV/r/OBV + RBV 12 w<br>TE: PTV/r/OBV + RBV 12 w | PTV/r/OBV +DAV without RBV yielded high SVR rates (>91%) but increased to 100% when RBV was added both in treatment naïve and treatment experienced patients with HCV4 infection without cirrhosis. Treatment was well tolerated.                                                          | Low<br>(AbbVie)                         |
| <b>Pearl II<br/>NCT 01674725<br/>Andreone<br/>Gastroenterol<br/>ogy 2014</b> | HCV 1b<br>Treatment experienced<br>Without cirrhosis             | RCT<br>Phase 3<br>(N= 186)<br>Multicenter                             | PTV/r/OBV + DAV + RBV 12 w<br>PTV/r/OBV + DAV + Plac 12 w                   | PTV/r/OBV +DAV for 12 weeks yielded high SVR rates in HCV 1b treatment experienced patients without cirrhosis. The addition of RBV did not improve the outcome (100 vs 97%) but increased the incidence of AEs                                                                             | Low<br>( AbbVie)                        |
| <b>Pearl III<br/>NCT 01767116<br/>Ferenci<br/>NEJM 2014</b>                  | HCV 1b<br>Treatment naïve<br>Without cirrhosis                   | RCT<br>Phase 3<br>(N= 419)<br>Multicenter                             | PTV/r/OBV+ DAV + RBV 12 w<br>PTV/r/OBV + DAV +Plac 12 w                     | PTV/r/OBV + DAV for 12 weeks yielded high SVR rates in treatment naïve patients with HCV1b infection without cirrhosis. The addition of RBV did not improve the outcome (99 vs 99%) but increased the incidence of AEs                                                                     | Low<br>(AbbVie)                         |
| <b>Pearl IV<br/>NCT 01833533<br/>Ferenci 2014</b>                            | HCV 1a<br>Treatment naïve<br>Without cirrhosis                   | RCT<br>Phase 3<br>(N= 305)<br>Multicenter                             | PTV/r/OBV + DAV + RBV 12 w<br>PTV/r/OBV + DAV + Plac 12 w                   | PTV/r/OBV + DAV for 12 weeks yielded high SVR rates in treatment naïve patients with HCV1a infection without cirrhosis. The addition of RBV increased SVR rates from 90 to 97% but also increased the incidence of AEs especially anemia (42% vs 4%)                                       | Low<br>( AbbVie)                        |
| <b>Sapphire I<br/>NCT 01716585<br/>Feld<br/>NEJM 2014</b>                    | HCV 1<br>Treatment naïve<br>Without cirrhosis                    | RCT<br>Phase 3 plus open<br>label (N=631)<br>Multicenter              | PTV/r/OBV+ DAV + RBV 12 w<br>Placebo 12 w + Deferred treatment              | PTV/r/OBV + DAV + RBV for 12 weeks yielded high SVR rates in treatment naïve patients with HCV 1a and 1b infection without cirrhosis. (96, 95 and 98%) Treatment was well tolerated.                                                                                                       | Low<br>( AbbVie)                        |
| <b>Sapphire II<br/>NCT 01715415<br/>Zeuzem<br/>NEJM 2014</b>                 | HCV 1<br>Treatment experienced<br>Without cirrhosis              | RCT<br>Phase 3<br>Open label (N=394)<br>Multicenter                   | PTV/r/OBV+ DAV + RBV 12 w<br>Placebo 12 w + Deferred treatment              | PTV/r/OBV + DAV + RBV for 12 weeks yielded high SVR rates (>96%) in treatment experienced 1a and 1b infected patients, without cirrhosis (96 and 97%). Treatment was well tolerated.                                                                                                       | Low<br>(AbbVie)                         |
| <b>TURQUOISE I<br/>NCT 01717326<br/>Sulkowski<br/>JAMA 2015</b>              | HCV 1<br>With HCV/HIV<br>coinfection                             | RCT<br>Phase 2<br>(N= 63)<br>Multicenter US                           | PTV/r/OBV+ DAV + RBV 12 w<br>PTV/r/OBV+ DAV + RBV 24w                       | PTV/r/OBV+ DAV + RBV for 12 weeks yielded high SVR rates in patients co-infected with HCV and HIV ( 94%). Extending treatment from 12 to 24 weeks did not improve outcomes. Treatment was in general safe and did not interfere with antiretrovirals                                       | Low<br>(AbbVie)                         |
| <b>TURQUOISE II<br/>NCT 01704755<br/>Poordad<br/>NEJM 2014</b>               | HCV 1<br>Treatment naïve and<br>experienced<br>With cirrhosis    | RCT<br>Phase 3<br>(N= 380)<br>Multicenter                             | PTV/r/OBV + DAV + RBV 12w<br>PTV/r/OBV +DAV + RBV 24w                       | PTV/r/OBV + DAV + RBV yielded high SVR rates in patients with HCV 1a and 1b infection. Extending treatment from 12 to 24 weeks increased SVR rates in HCV1a (87% vs 94%) but not in HCV1b (99% vs 100%) infection and was associated with increased AEs (most notably fatigue and dyspnea) | Moderate<br>(AbbVie)                    |
| <b>CORAL-1<br/>NCT 01782495<br/>Kwo<br/>NEJM 2014</b>                        | HCV 1<br>Post Liver transplant 12<br>months prior                | RCT<br>Phase 2<br>(N= 34)<br>Multicenter                              | PTV/r/OBV + DAV + RBV 24 w                                                  | PTV/r/OBV/DAV + RBV for 24 weeks yielded high SVR rates in patients with recurrent HCV1 infection post liver-transplant.                                                                                                                                                                   | Moderate<br>(AbbVie)                    |
| <b>RUBY-1<br/>NCT 02207088<br/>Pockros<br/>Gastroenterol<br/>ogy 2016</b>    | HCV 1<br>Treatment naïve<br>CKD stage 4-5<br>Without cirrhosis   | RCT<br>Phase 3<br>(N= 20)<br>Multicenter US                           | HCV 1a<br>PTV/r/OBV +DAV + RBV 12 w<br>HCV 1b<br>PTV/r/OBV+ DAV 12 w        | PTV/r/OBV + DAV+/- RBV for 12 weeks was efficacious in patients with HCV1 infection and stage 4 or 5 CKD, including those on hemodialysis (SVR 90%). RBV was interrupted in 9 of 14 patients and 4 received erythropoietin.                                                                | Moderate<br>(AbbVie)                    |
| <b>OPTIMIST 1<br/>NCT 02114177<br/>Kwo<br/>Hepatology<br/>2016</b>           | HCV 1<br>Treatment naïve and<br>experienced<br>Without cirrhosis | RCT<br>Phase 3<br>Open label<br>(N= 310)<br>Multicenter US-<br>Canada | SIM + SOF 8 w<br>SIM + SOF 12 w                                             | SIM + SOF for 12 weeks achieved higher SVR rates than 8 weeks (97 vs 83%) in treatment naïve and experienced HCV1 infected patients without cirrhosis. Treatment was well tolerated.                                                                                                       | Low<br>(Janssen<br>Pharmaceuti<br>cals) |

|                                                                                                                                                                                                                                                                             |                                                                                        |                                                                   |                                                                                                                                                                                        |                                                                                                                                                                                                                                                           |                                              |
|-----------------------------------------------------------------------------------------------------------------------------------------------------------------------------------------------------------------------------------------------------------------------------|----------------------------------------------------------------------------------------|-------------------------------------------------------------------|----------------------------------------------------------------------------------------------------------------------------------------------------------------------------------------|-----------------------------------------------------------------------------------------------------------------------------------------------------------------------------------------------------------------------------------------------------------|----------------------------------------------|
| <b>OPTIMIST 2</b><br><b>NCT 02114151</b><br><b>Lawitz</b><br><b>Hepatology</b><br><b>2016</b><br><b>Cosmos</b><br><b>NCT 01466790</b><br><b>Lawitz</b><br><b>Lancet 2014</b>                                                                                                | HCV 1<br>Treatment naïve and experienced<br>With cirrhosis                             | Open label single arm<br>(N= 103)<br>Multicenter US-Canada<br>RCT | SIM + SOF 12 w                                                                                                                                                                         | SIM + SOF for 12 weeks achieved relatively low SVR rates in HCV1 infected treatment naïve (88%) and treatment experienced (79%) patients with cirrhosis.                                                                                                  | Moderate<br>(Janssen Pharmaceuticals)        |
| <b>OSIRIS</b><br><b>NCT 02278419</b><br><b>EI-Raziky</b><br><b>J Viral Hep</b><br><b>2016</b>                                                                                                                                                                               | HCV 1<br>Treatment naïve and experienced<br>With and without cirrhosis                 | Phase 2<br>(N= 168)<br>Multicenter US                             | SIM + SOF 12 w<br>SIM + SOF + RBV 12 w<br>SIM + SOF 24 w<br>SIM + SOF + RBV 24 w                                                                                                       | SIM + SOF for 12 weeks achieved high SVR rates in HCV1a (95%) and HCV1b (100%) treatment naïve and treatment experienced HCV 1 infected patients..                                                                                                        | Moderate<br>(Janssen Pharmaceuticals)        |
| <b>AI444040</b><br><b>NCT 01359644</b><br><b>Sulkowski</b><br><b>NEJM 2015</b>                                                                                                                                                                                              | HCV 1, 2 and 3<br>Treatment naïve and experienced<br>Without cirrhosis                 | RCT<br>Open label<br>(N=211)<br>Multicenter US                    | Non cirrhotic<br>SIM + SOF 8 weeks<br>SIM + SOF 12 weeks                                                                                                                               | SIM + SOF for 12 weeks was associated with high SVR rates (100%) in HCV 4 regardless of treatment experience or cirrhosis status. SIM + SOF for 8 weeks was associated with lower SVR rates in HCV 4 (75%). Treatment was well tolerated                  | Moderate<br>(Janssen Pharmaceuticals)        |
| <b>ALLY-1</b><br><b>NCT02032875</b><br><b>Poordad</b><br><b>Hepatology</b><br><b>2016</b><br><b>ALLY-2</b><br><b>NCT 02032888</b><br><b>Wyles</b><br><b>NEJM</b>                                                                                                            | HCV 1-4 and 6<br>Pre and Post Liver transplant                                         | RCT<br>Open label<br>(N=113)<br>Multicenter US                    | Cirrhotic<br>SIM + SOF<br>HCV1-N: DCV + SOF 23w<br>HCV1-N: - DCV + SOF 24w<br>HCV1-N: DCV + SOF+ RBV 24w                                                                               | DCV + SOF for 24 weeks yielded high SVRs in patients with HCV1 treatment naïve or treatment experienced and HCV2 or 3 without cirrhosis (up to 100%). The addition of RBV does not improve the outcomes but increases the risk of AEs.                    | Moderate<br>( Bristol-Myers Squibb & Gilead) |
| <b>ALLY-3</b><br><b>NCT 02032901</b><br><b>Nelson</b><br><b>Hepatology</b><br><b>2015</b><br><b>ALLY 3 Plus</b><br><b>NCT 02319031</b><br><b>Leroy</b><br><b>Hepatology</b><br><b>2016</b><br><b>LONESTAR</b><br><b>NCT 01726517</b><br><b>Lawitz</b><br><b>Lancet 2014</b> | HCV 1-4 and 6<br>Pre and Post Liver transplant                                         | Open label<br>Single arm<br>(N= 113)<br>Multi Center US           | Advanced Cirrhosis<br>DCV+ SOF + RBV 12 w                                                                                                                                              | DCV + SOF+ RBV for 12 weeks achieved high SVR rates across multiple HCV genotypes among patients with post-liver transplantation HCV recurrence or advanced cirrhosis and was well tolerated                                                              | Moderate<br>(Bristol Myers Squibb)           |
| <b>ALLY-2</b><br><b>NCT 02032888</b><br><b>Wyles</b><br><b>NEJM</b>                                                                                                                                                                                                         | HCV 1-4 and HIV co-infection<br>Treatment naïve and experienced                        | Open label<br>RCT<br>(N= 203)<br>Multicenter US                   | Post-Transplant<br>DCV + SOF + RBV 12 w<br>TN: DCV + SOF 8w<br>TN: DCV + SOF 12w<br>TE: DCV + SOF 12w                                                                                  | DCV + SOF for 12 weeks achieved higher SVR rates across multiple HCV genotypes among treatment naïve (97%) and treatment experienced (98%) patients with HIV co-infection compared to 8 weeks of treatment (76%).                                         | Moderate<br>(Bristol Myers Squibb)           |
| <b>ALLY-3</b><br><b>NCT 02032901</b><br><b>Nelson</b><br><b>Hepatology</b><br><b>2015</b><br><b>ALLY 3 Plus</b><br><b>NCT 02319031</b><br><b>Leroy</b><br><b>Hepatology</b><br><b>2016</b><br><b>LONESTAR</b><br><b>NCT 01726517</b><br><b>Lawitz</b><br><b>Lancet 2014</b> | HCV 3<br>Treatment naïve and experienced<br>With and without cirrhosis                 | Open label<br>Single arm<br>(N= 152)<br>Multicenter               | TN : DCV + SOF 12 w<br>TE: DCV + SOF 12 w                                                                                                                                              | DCV + SOF for 12 weeks achieved high SVR rates in among treatment naïve (90%) or treatment experienced (86%) patients with cirrhosis. Treatment was well tolerated.                                                                                       | Moderate<br>(Gilead)                         |
| <b>ALLY 3 Plus</b><br><b>NCT 02319031</b><br><b>Leroy</b><br><b>Hepatology</b><br><b>2016</b><br><b>LONESTAR</b><br><b>NCT 01726517</b><br><b>Lawitz</b><br><b>Lancet 2014</b>                                                                                              | HCV 3<br>Treatment naïve and experienced<br>With advanced fibrosis including cirrhosis | RCT<br>Phase 3<br>Open label<br>(N= 50)<br>Multicenter            | DCV+ SOF + RBV 12 w<br>DCV + SOF + RBV 16 w                                                                                                                                            | DCV + SOF + RBV for 12 weeks achieved high SVR rates in patients with HCV3 infection in previously treated (88%) with cirrhosis (83%) and advanced fibrosis (100%). Increased length of treatment did not improve outcomes. Treatment was well tolerated. | Moderate<br>(Bristol Myers Squibb)           |
| <b>ION-1</b><br><b>NCT 01701401</b><br><b>Afdhal,</b><br><b>NEJM 2014</b>                                                                                                                                                                                                   | HCV 1<br>Treatment naïve<br>With and without cirrhosis                                 | RCT<br>Phase 2<br>(N= 100)<br>Single center US                    | TN: LDV/SOF 8 w<br>TN: LDV/SOF + RBV 8 w<br>TN: LDV/SOF 12 w<br>TE: LDV/SOF 12 w<br>TE: LDV/SOF + RBV 12 w<br>LDV/SOF 12 w<br>LDV/SOF + RBV 12 w<br>LDV/SOF 24 w<br>LDV/SOF + RBV 24 w | LDV/SOF with or without RBV yielded high SVR rates (>95%) in treatment naïve and experienced patients with HCV1 infection.                                                                                                                                | Low<br>(Gilead)                              |
| <b>ION-1</b><br><b>NCT 01701401</b><br><b>Afdhal,</b><br><b>NEJM 2014</b>                                                                                                                                                                                                   | HCV1<br>Treatment naïve<br>With and without cirrhosis                                  | RCT<br>Phase 3<br>Open label<br>(N=865)<br>Multicenter            | LDV/SOF 12 w<br>LDV/SOF + RBV 12 w<br>LDV/SOF 24 w<br>LDV/SOF + RBV 24 w                                                                                                               | LDV/SOF with or without RBV yielded high SVR rates (>97%) in patients with HCV1 (a and b) infection with and without cirrhosis. The addition of RBV and the extension of the treatment duration increased the risk of AEs                                 | Moderate<br>(Gilead)                         |

|                                                                                                                                            |                                                                                             |                                                            |                                                                                                                              |                                                                                                                                                                                                                                                                                                                                                                                                                                                                                                                                                                                                                                                                                                                                                         |                                                                                                             |
|--------------------------------------------------------------------------------------------------------------------------------------------|---------------------------------------------------------------------------------------------|------------------------------------------------------------|------------------------------------------------------------------------------------------------------------------------------|---------------------------------------------------------------------------------------------------------------------------------------------------------------------------------------------------------------------------------------------------------------------------------------------------------------------------------------------------------------------------------------------------------------------------------------------------------------------------------------------------------------------------------------------------------------------------------------------------------------------------------------------------------------------------------------------------------------------------------------------------------|-------------------------------------------------------------------------------------------------------------|
| <b>ION-2</b><br><b>NCT 01768286</b><br><b>Afdhal,</b><br><b>NEJM 2014</b>                                                                  | HCV 1<br>Treatment experienced<br>With and without cirrhosis                                | RCT<br>Phase 3<br>Open label<br>(N= 440)<br>Multicenter US | LDV/SOF 12 w<br>LDV/SOF + RBV 12 w<br>LDV/SOF 24 w<br>LDV/SOF + RBV 24 w                                                     | LDV/SOF with or without RBV, yielded high SVRs (>94%) in treatment experienced patients with HCV1 (a and b) infection. Patients with cirrhosis may have a better response with longer treatments (86 and 82% vs 100%)                                                                                                                                                                                                                                                                                                                                                                                                                                                                                                                                   | Moderate<br>(Gilead)                                                                                        |
| <b>ION-3</b><br><b>NCT 01851330</b><br><b>Kowdley</b><br><b>NEJM 2014</b>                                                                  | HCV 1<br>Treatment naïve<br>Without cirrhosis.                                              | RCT<br>Phase 3<br>(N= 647)<br>Multicenter US               | LDV/SOF 8 w<br>LDV/SOF + RBV 8 w<br>LDV/SOF 12 w                                                                             | LDV/SOF with or without RBV yielded high SVRs (>92%) in patients with HCV1 (a and b) infection without cirrhosis. The addition of RBV increases the risk and severity of AEs                                                                                                                                                                                                                                                                                                                                                                                                                                                                                                                                                                            | Moderate<br>(Gilead)                                                                                        |
| <b>ION-4</b><br><b>NCT02073656</b><br><b>Naggie</b><br><b>NEJM 2015</b>                                                                    | HCV 1-4<br>HIV co-infected<br>Treatment naïve and experienced<br>With and without cirrhosis | Open label single arm<br>(N= 335)<br>Multicenter           | LDV/SOF 12 w                                                                                                                 | LDV/SOF yielded high SVR rates (96%) in patients with HCV1 (a and b) infection and HIV co-infection. Treatment was in general safe and did not interfere with antiretrovirals                                                                                                                                                                                                                                                                                                                                                                                                                                                                                                                                                                           | Moderate<br>(Gilead)                                                                                        |
| <b>SIRIUS</b><br><b>NCT 01965535</b><br><b>Bourliere</b><br><b>Lancet 2015</b>                                                             | HCV 1 Treatment experienced<br>With cirrhosis                                               | RCT<br>Phase 2<br>(N= 155)<br>Multicenter France           | LDV/SOF 24 w<br>LDV/SOF + RBV 12 w                                                                                           | LDV/SOF for 24 weeks yielded high SVR rates (97%). LDV/SOF + RBV for 12 weeks yielded similar SVR rates (96%) among treatment experienced patients with HCV genotype1 infection with cirrhosis. The incidence of AEs was comparable.                                                                                                                                                                                                                                                                                                                                                                                                                                                                                                                    | Low<br>(Gilead)                                                                                             |
| <b>Gane</b><br><b>NCT 01826981.</b><br><b>Gastroenterology</b><br><b>2015</b><br><b>Kohli</b><br><b>NCT 01805882</b><br><b>Lancet 2014</b> | HCV 3 and 6<br>Treatment naïve and experienced<br>With and without cirrhosis                | RCT<br>Phase 3<br>Open label<br>(N= 126)<br>Multicenter NZ | HCV3<br>TN: LDV/SOF 12 w<br>TN: LDV/SOF + RBV 12 w<br>TE: LDV/SOF + RBV 12 w<br>HCV 6<br>TN/TE: LDV/SOF 12 w<br>LDV/SOF 12 w | Patients with HCV genotype 3 infection benefited from the addition of RBV to LDV/SOF (SVR from 64% to 100% in treatment naïve population, 82% in treatment experienced) Patients with HCV6 infection had high response without RBV (96%) SVR not reported by cirrhosis status                                                                                                                                                                                                                                                                                                                                                                                                                                                                           | Low<br>(Gilead)                                                                                             |
| <b>Abergel</b><br><b>NCT 02081079</b><br><br><b>Hepatology</b><br><b>2016</b><br><b>Lancet 2016</b>                                        | HCV 4<br>Treatment naïve and experienced<br>With and without cirrhosis                      | Open label<br>Single arm<br>(N=44)<br>Multicenter France   | LDV/SOF 12 w                                                                                                                 | LDV/SOF is overall effective (SVRs 93%) among both treatment naïve and experienced patients with HCV genotype 4 infection. Treatment is well tolerated.                                                                                                                                                                                                                                                                                                                                                                                                                                                                                                                                                                                                 | Moderate<br>(NIH + Cooperative Research Development Agreement with Gilead)<br>Moderate<br>(Gilead Sciences) |
| <b>Charlton</b><br><b>SOLAR-1</b><br><b>NCT 01938430</b><br><b>Gastroenterology</b><br><b>2015</b>                                         | HCV 5<br>Treatment naïve and experienced<br>With and without cirrhosis                      | Open label<br>Single arm<br>(N= 41)<br>Multicenter France  | LDV/SOF 12 w                                                                                                                 | LDV/SOF is overall effective in patients with HCV genotype 5 infection among both treatment naïve and experienced patients (SVR 95%), but less so in patients with cirrhosis (89% vs 97%) Treatment is well tolerated.                                                                                                                                                                                                                                                                                                                                                                                                                                                                                                                                  | Moderate<br>(Gilead)                                                                                        |
| <b>SOLAR-2</b><br><b>NCT 02010255</b><br><b>Manns</b><br><b>Lancet 2016</b>                                                                | HCV 1 and 4<br>Advanced liver disease<br>Pre and post liver transplantation                 | RCT<br>Phase 2<br>Open label<br>(N= 333)<br>Multicenter    | LDV/SOF + RBV 12 w<br>LDV/SOF + RBV 24 w<br>10 arms<br>CTP classes A,B,C<br>Pre vs Post-transplant-                          | LDV/SOF + RBV for 12 or 24 weeks achieved high SVR rates in patients with advanced liver disease and decompensated cirrhosis before liver transplantation (SVR >87%). SVR remained high after liver transplantation in patients without decompensated cirrhosis, but was much lower among post-liver transplant patients with decompensated liver disease. Treatment did not interfere with immunosuppressive management<br>LDV/SOF+ RBV for 12 or 24 weeks achieved high SVR rates in patients with advanced liver disease and decompensated cirrhosis before liver transplantation(SVR >85%). SVR remained high after liver transplantation in patients without decompensated cirrhosis, but was much lower among post-liver transplant patients with | Low<br>(Gilead)                                                                                             |

decompensated liver disease. Treatment did not interfere with immunosuppressive management

|                                                                             |                                                                                   |                                               |                                                 |                                                                                                                                                                                                                      |                      |
|-----------------------------------------------------------------------------|-----------------------------------------------------------------------------------|-----------------------------------------------|-------------------------------------------------|----------------------------------------------------------------------------------------------------------------------------------------------------------------------------------------------------------------------|----------------------|
| <b>ASTRAL 1</b><br><b>NCT 02201940</b><br><b>Feld</b><br><b>NEJM 2015</b>   | HCV 1, 2,4 and 6<br>Treatment naïve and experienced<br>With and without cirrhosis | RCT<br>Phase 3<br>(N= 706)<br>Multicenter     | VEL/SOF 12w<br>Placebo + Deferred treatment     | VEL/SOF for 12 weeks achieved high SVR rates across multiple HCV genotypes among treatment naïve and experienced patients, with and without cirrhosis. Treatment was well tolerated.                                 | Low<br>(Gilead)      |
| <b>ASTRAL 2</b><br><b>NCT 02220998</b><br><b>Foster</b><br><b>NEJM 2015</b> | HCV 2<br>Treatment naïve and experienced<br>With and without cirrhosis            | RCT<br>Phase 3<br>(N= 266)<br>Multi Center US | VEL/SOF 12w<br>SOF + RBV 12w                    | VEL/SOF achieved higher SVR rates than SOF + RBV (99 vs 94%) in treatment naïve and experienced patients with HCV2 infection, with and without cirrhosis                                                             | Low<br>(Gilead)      |
| <b>ASTRAL 3</b><br><b>NCT 02201953</b><br><b>Foster</b><br><b>NEJM 2015</b> | HCV 3<br>Treatment naïve and experienced<br>With and without cirrhosis            | RCT<br>Phase 3<br>(N= 552)<br>Multicenter     | VEL/SOF 12w<br>SOF + RBV 24w                    | VEL/SOF for 12 weeks achieved higher SVR rates than SOF + RBV for 24 weeks (95 vs 80%) in treatment naïve and experienced patients with HCV3 infection with and without cirrhosis and was associated with fewer AEs. | Low<br>(Gilead)      |
| <b>ASTRAL 4</b><br><b>NCT 02201901</b><br><b>Curry</b><br><b>NEJM 2015</b>  | HCV 1-6<br>decompensated cirrhosis (Child Pugh class B)                           | RCT<br>Phase 3<br>N= 267<br>Multi Center US   | VEL/SOF 12w<br>VEL/SOF + RBV 12w<br>VEL/SOF 24w | VEL/SOF + RBV for 12 weeks achieved high SVR rates across multiple HCV genotypes within patients with decompensated cirrhosis. Lower SVRs were seen for patients with HCV 3 infection. Treatment was well tolerated. | Moderate<br>(Gilead) |

HCV = Hepatitis C Virus; RCT = Randomized Control Trial; TN = Treatment Naïve; TE = Treatment experienced; CTP = Child Turcotte Pugh; GZP = Grazoprevir; EBV = Elbasvir; RBV = Ribavirin; PTV/r = Paritaprevir/Ritonavir; OBV = Ombitasvir; DAV = Dasabuvir; SOF = Sofosbuvir; SIM = Simeprevir; DCV = Daclatasvir; LDV = Ledipasvir; VEL = Velpatasvir; AEs = Adverse events

**Table 2. Follow up and adverse event summary table by clinical trial and oral DAA regimen**

| Study, Author, Year, Country                                                  | Target population                                                                                      | DAA Regimen                                  | Patients enrolled/lost to follow up | Serious AEs | Fatigue | Headache | Anemia                     | Nausea  | Rash     |
|-------------------------------------------------------------------------------|--------------------------------------------------------------------------------------------------------|----------------------------------------------|-------------------------------------|-------------|---------|----------|----------------------------|---------|----------|
| <b>C-WORTHY<br/>NCT 01717326<br/><br/>Lawitz<br/>Lancet 2015</b>              | HCV 1<br>Treatment naïve or experienced<br>With and without cirrhosis                                  | Treatment Naive With cirrhosis               |                                     |             |         |          | Hb >8.5 <10 g/dl           | NR      | NR       |
|                                                                               |                                                                                                        | GZP/EBV 12w                                  | 29/ 0                               | 2 (7)       | 5 (17)  | 5 (17)   | 0                          |         |          |
|                                                                               |                                                                                                        | GZP/EBV + RBV 12w                            | 31/ 0                               | 0           | 9 (29)  | 2 (6)    | 5 (16)                     |         |          |
|                                                                               |                                                                                                        | GZP/EBV 18w                                  | 31/ 0                               | 0           | 5 (16)  | 10 (32)  | 0                          |         |          |
|                                                                               |                                                                                                        | GZP/EBV + RBV 18w                            | 32/ 1                               | 1 (3)       | 9 (29)  | 11 (34)  | 2 (6)                      |         |          |
|                                                                               |                                                                                                        | Treatment Experienced With/Without cirrhosis | 33/ 0                               | 1(3)        | 9 (27)  | 6 (18)   | 0                          |         |          |
|                                                                               |                                                                                                        | GZP/EBV 12w                                  | 32/ 2                               | 2 (6)       | 6 (19)  | 9 (28)   | 1 (3)                      |         |          |
|                                                                               |                                                                                                        | GZP/EBV + RBV 12w                            | 32/ 0                               | 1 (3)       | 8 (25)  | 10 (31)  | 0                          |         |          |
|                                                                               |                                                                                                        | GZP/EBV 18w                                  | 33/ 0                               | 0           | 15 (45) | 6 (18)   | 3 (9)                      |         |          |
|                                                                               |                                                                                                        | GZP/EBV + RBV 18w                            |                                     |             |         |          |                            |         |          |
| <b>Sulkowski<br/>Lancet 2015</b>                                              | HCV 1 Treatment naïve<br>Without cirrhosis.<br>With and without HIV coinfection                        | Monoinfected                                 |                                     |             |         |          | Hb >8.5 <10 g/dl           |         | NR       |
|                                                                               |                                                                                                        | GZP/EBV +RBV 8w                              | 30/1                                | 0           | 14 (47) | 7 (23)   | 1 (3)                      | 8 (27)  |          |
|                                                                               |                                                                                                        | GZP/ EBV +RBV 12w                            | 85/3                                | 1 (1)       | 23 (27) | 17 (20)  | 8 (10)                     | 16 (19) |          |
|                                                                               |                                                                                                        | GZP/EBV 12w                                  | 44/0                                | 0           | 10 (23) | 15 (35)  | 0                          | 7 (16)  |          |
|                                                                               |                                                                                                        | Coinfected                                   |                                     | 1 (3)       | 2 (7)   | 4 (14)   | 1 (3)                      | 0       |          |
|                                                                               |                                                                                                        | GZP/EBV +RBV 12w                             | 29/0                                | 1 (3)       | 2 (7)   | 1 (3)    | 0                          | 1 (3)   |          |
| GZP/EBV 12w                                                                   | 30/2                                                                                                   |                                              |                                     |             |         |          |                            |         |          |
| <b>C-EDGE<br/><br/>Zeuzem<br/>Annals 2015</b>                                 | HCV 1, 4, & 6<br>Treatment naïve<br>With and without cirrhosis                                         | GZP/EBV 12w                                  | 316/4                               | 9(3)        | 49(16)  | 52(17)   | Anemia (total)<br>9 (1.1%) | NR      | NR       |
|                                                                               |                                                                                                        | Placebo + Deferred treatment                 | 105/0                               | 3(3)        | 18(17)  | 19(18)   | 4 (4%)                     |         |          |
| <b>Rockstroh<br/>Lancet 2015</b>                                              | HCV 1-4-6*<br>Treatment naïve<br>With and without cirrhosis.<br>With HIV coinfection                   | GZP/EBV 12w                                  | 218/1                               | 2 (1)       | 29 (13) | 27 (12)  | 0                          | 20 (9)  | NR       |
| <b>C-EDGE TE<br/>NCT 02105701<br/>Kwo<br/>Gastroenterology<br/>2016</b>       | HCV 1, 4, & 6<br>Treatment experienced<br>With and without cirrhosis<br>With and without HIV infection | GZP/EBV 12w                                  | 105/2                               | 4 (4)       | 20 (19) | 22 (21)  | 0 (0)                      | 9 (9)   | NR       |
|                                                                               |                                                                                                        | GZP/EBV +RBV 12w                             | 104/0                               | 3 (3)       | 28 (27) | 21 (20)  | 12 (12)                    | 15 (14) |          |
|                                                                               |                                                                                                        | GZP/ EBV 16w                                 | 105/1                               | 3 (3)       | 17 (16) | 20 (19)  | 0 (0)                      | 4 (4)   |          |
|                                                                               |                                                                                                        | GZP/EBV +RBV 16w                             | 106/2                               | 4 (4)       | 32 (30) | 20 (19)  | 17 (16)                    | 18 (17) |          |
| <b>C-SURFER<br/>NCT 02092350<br/>Roth<br/>Lancet 2015</b>                     | HCV 1<br>Treatment naïve<br>CKD stage 4-5                                                              | GZP/EBV 12w                                  | 111/4                               | 16 (15)     | 11 (10) | 19 (17)  | Hb < 8.5 g/dl<br>5 (4.5)   | 17 (15) | NR       |
|                                                                               |                                                                                                        | Placebo + Deferred treatment                 | 113/1                               | 19 (17)     | 17 (15) | 19 (17)  | 5 (4.4)                    | 18 (16) |          |
| <b>Pearl 1<br/>NCT 01685203<br/><br/>Lawitz<br/>Gastroenterology<br/>2015</b> | HCV 1b<br>Treatment naïve or experienced<br>With and without cirrhosis                                 | Without cirrhosis                            |                                     |             |         |          | Hb <8 g/dl                 |         |          |
|                                                                               |                                                                                                        | TN: PTV/r/OBV + RBV 12w                      | 42/2                                | 1 (2.4)     | 6 (14)  | 14 (33)  | 0                          | 8 (19)  | 7 (16.7) |
|                                                                               |                                                                                                        | TE: PTV/r-OB + RBV 12w                       | 40/0                                | 1 (2.5)     | 0       | 10 (25)  | 0                          | 0       | 0        |
|                                                                               |                                                                                                        | With cirrhosis                               |                                     |             |         |          |                            |         |          |
| TN: PTV/r/OBV+ RBV 24w                                                        | 47/1                                                                                                   | 3 (6.4)                                      | 4 (8)                               | 9 (19)      | 1 (1)   | 5 (11)   | 1 (1)                      |         |          |
| TE: PTV/r-OBV + RBV 24w                                                       | 52/0                                                                                                   | 0                                            | 6 (11)                              | 9 (17)      | 1 (2)   | 5 (10)   | 1 (2.1)                    |         |          |

|                                                                             |                                                                 |                                                                          |                         |                                           |                                |                              |                                                                 |                                                |                    |    |
|-----------------------------------------------------------------------------|-----------------------------------------------------------------|--------------------------------------------------------------------------|-------------------------|-------------------------------------------|--------------------------------|------------------------------|-----------------------------------------------------------------|------------------------------------------------|--------------------|----|
| <b>Hezode<br/>Lancet 2015</b>                                               | HCV 4<br>Treatment naïve or<br>experienced<br>Without cirrhosis | UT: PTV/r/OBV 12 w<br>UT : PTV/r/OBV+ RBV 12 w<br>T: PTV/r/OBV+ RBV 12 w | 44 /1<br>42/ 0<br>49/ 0 | 1 (2)<br>0<br>0                           | 3(7)<br>5(12)<br>9(18)         | 13(30)<br>14 (33)<br>14 (29) | Hb <10 g/dl<br>1 (2)<br>2 (4)<br>1 (2)                          | 4 (9)<br>7 (17)<br>6 (12)                      | NR                 |    |
| <b>Pearl II<br/>NCT 01674725<br/>Andreone<br/>Gastroenterology<br/>2014</b> | HCV 1b<br>Treatment naïve<br>Without cirrhosis                  | PTV/r/OBV + DAV+ RBV 12 w<br>PTV/r/OBV + DAV + Plac 12 w                 | 91/0<br>95/0            | 2 (2)<br>2 (2)                            | 29 (32)<br>15 (16)<br>P = 0.02 | 22 (24)<br>22 (23)           | Hb <ULN<br>37 (42)<br>5 (5)<br>P<0.001                          | 19 (21)<br>6 (6)                               | 8 (9)<br>1 (1)     |    |
| <b>Pearl III<br/>NCT 01767116<br/>Ferenci<br/>NEJM 2014</b>                 | HCV 1b<br>Treatment naïve<br>Without cirrhosis                  | PTV/r/OBV + DAV + RBV 12 w<br>PTV/r/OBV + DAV + Plac 12 w                | 210/1<br>209/1          | 2 (1)<br>1 (0.5)                          | 45 (21)<br>48 (23)             | 51 (24)<br>49 (23)           | Hb <ULN<br>106/207 (51)<br>7/205 (3.4)<br>P<0.001               | 23 (11)<br>9 (4)                               | NR                 |    |
| <b>Pearl IV<br/>NCT 01833533<br/>Ferenci 2014</b>                           | HCV 1a<br>Treatment naïve<br>Without cirrhosis                  | PTV/r-OBV + DAV + RBV 12 w<br>PTV/r-OBV + DAV + Plac 12 w                | 100/0<br>205/5          | 2 (2)<br>4 (2)                            | 46 (46)<br>72 (35)             | 25 (25)<br>58 (23)           | Hb <10 g/dl<br>19 (9)<br>0 (-)<br>P<0.001                       | Hb <ULN<br>42/100 (42)<br>8/203 (4)<br>P<0.001 | 21 (21)<br>28 (14) | NR |
| <b>Sapphire I<br/>NCT 01716585<br/>Feld<br/>NEJM 2014</b>                   | HCV 1<br>Treatment naïve<br>Without cirrhosis                   | PTV/r/OBV + DAV + RBV 12 w<br>Placebo + Deferred treatment               | 473/5<br>158/0          | 10 (2.1)<br>0                             | 164 (35)<br>45 (28)            | 156 (33)<br>42 (27)          | Hb <10 g/dl<br>4 (4)<br>0 (-)<br>P= 0.01<br>Grade 3-4<br>0<br>0 | 112 (24)<br>21 (13)                            | 51 (11)<br>9 (6)   |    |
| <b>Sapphire II<br/>NCT 01715415<br/>Zeuzem<br/>NEJM 2014</b>                | HCV 1<br>Treatment<br>experienced<br>Without cirrhosis          | PTV/r/OBV + DAV + RBV 12 w<br>Placebo + Deferred treatment               | 297/2<br>97/1           | 6 (2)<br>1 (1)                            | 99 (33)<br>22 (23)             | 108 (36)<br>34 (35)          | Grade 3-4<br>1/296 (0.3)<br>0                                   | 60 (20)<br>17 (17)                             | NR                 |    |
| <b>TURQUOISE I<br/>NCT 01717326<br/>Sulkowski<br/>JAMA 2015</b>             | HCV 1<br>and HCV/HIV<br>coinfection                             | PTV/r/OBV+ DAV+ RBV 12 w<br>PTV/r/OBV+ DAV + RBV 24w                     | 31/1<br>32/0            | 0<br>0                                    | 18 (58)<br>12 (38)             | 6 (19)<br>4 (13)             | Hb 10 g/dl<br>4 (13)<br>3 (9)                                   | 5 (16)<br>6 (19)                               | NR                 |    |
| <b>TURQUOISE II<br/>NCT 01704755<br/>Poordad<br/>NEJM 2014</b>              | HCV 1<br>Treatment naïve and<br>experienced With<br>cirrhosis   | PTV/r/OBV +DAV + RBV 12w<br>PTV/r /OBV + DAV + RBV 24w                   | 208/0<br>172/3          | 13 (6) –<br>1 death<br>8 (5) -<br>0 death | 68 (33)<br>80 (46)             | 58 (28)<br>53 (31)           | Grade 3-4<br>abnormality<br>3 (1.5)<br>1 (0.6)                  | 37 (18)<br>35 (20)                             | 23 (11)<br>25 (14) |    |
| <b>CORAL-1<br/>NCT 01782495<br/>Kwo<br/>NEJM 2014</b>                       | HCV<br>Post liver transplant 12<br>months prior                 | PTV/r/OBV+ DAV+ RBV 24 w                                                 | 34/0                    | 2 (6)                                     | 17 (50)                        | 15 (40)                      | Grade 3 Hb<br>1 (3)                                             | 8 (24)                                         | 7 (21)             |    |



|                                                                                                  |                                                                            |                                                                                                                                                                                                                                                                                                                                                                                                                                                                          |                                                              |                                                          |                                                                         |                                                                        |                                                                |                                                                   |                                                              |
|--------------------------------------------------------------------------------------------------|----------------------------------------------------------------------------|--------------------------------------------------------------------------------------------------------------------------------------------------------------------------------------------------------------------------------------------------------------------------------------------------------------------------------------------------------------------------------------------------------------------------------------------------------------------------|--------------------------------------------------------------|----------------------------------------------------------|-------------------------------------------------------------------------|------------------------------------------------------------------------|----------------------------------------------------------------|-------------------------------------------------------------------|--------------------------------------------------------------|
| <b>RUBY-1</b><br><b>NCT 02207088</b><br><b>Pockros</b><br><b>Gastroenterology</b><br><b>2016</b> | HCV 1<br>Treatment naïve<br>CKD stage 4-5<br>Without cirrhosis             | HCV 1a<br>PTV/r/OBV+ DAV+ RBV 12 w<br>HCV 1b<br>PTV/r/OBV+ DAV 12 w                                                                                                                                                                                                                                                                                                                                                                                                      | 13/0<br>7/0                                                  | 3 (23)<br>1 (14)                                         | 5 (38)<br>2 (29)                                                        | 3 (23)<br>0 (-)                                                        | Hb Grade 2<br>7 (54)<br>2 (29)<br>Hb Grade 3<br>1 (8)<br>0 (0) | 5 (38)<br>0 (-)                                                   | NR                                                           |
| <b>OPTIMIST 1</b><br><b>NCT 02114177</b><br><b>Kwo</b><br><b>Hepatology 2016</b>                 | HCV 1<br>Treatment naïve and<br>experienced<br>Without cirrhosis           | SIM +SOF 8 w<br>SIM + SOF 12 w                                                                                                                                                                                                                                                                                                                                                                                                                                           | 155/2<br>155/2                                               | 3 (2)<br>1 (1)                                           | 23 (15)<br>19 (12)                                                      | 26 (17)<br>22 (14)                                                     | NR                                                             | 14 (9)<br>23 (15)                                                 | 12 (8)<br>10 (6)                                             |
| <b>OPTIMIST 2</b><br><b>NCT 02114151</b><br><b>Lawitz</b><br><b>Hepatology 2016</b>              | HCV 1<br>Treatment naïve and<br>experienced<br>With cirrhosis              | SIM + SOF 12 w                                                                                                                                                                                                                                                                                                                                                                                                                                                           | 103/3                                                        | 5 (5)<br>1 death                                         | 21 (20)                                                                 | 21 (20)                                                                | NR                                                             | 11 (11)                                                           | 16 (16)                                                      |
| <b>Cosmos</b><br><b>NCT 01466790</b><br><b>Lawitz</b><br><b>Lancet 2014</b>                      | HCV 1<br>Treatment naïve and<br>experienced                                | SIM + SOF 12 w<br>SIM + SOF + RBV 12 w<br>SIM + SOF 24 w<br>SIM + SOF+ RBV 24 w                                                                                                                                                                                                                                                                                                                                                                                          | 28/1<br>54/1<br>31/1<br>54/4                                 | 0<br>0<br>1 (3)<br>3(6)                                  | NR                                                                      | NR                                                                     | 0<br>7(13)<br>1 (3)<br>16 (30)                                 | NR                                                                | 3(11)<br>11(20)<br>5(16)<br>10(19)                           |
| <b>OSIRIS</b><br><b>Raziky</b><br><b>J Viral Hep</b><br><b>2016</b>                              | HCV 4<br>Treatment Naïve<br>and Experienced                                | Non cirrhotic<br>SIM + SOF 8 weeks<br>SIM + SOF 12 weeks                                                                                                                                                                                                                                                                                                                                                                                                                 | 20/0<br>20/0                                                 | 0<br>0                                                   | 1 (5)<br>3 (15)                                                         | 2 (10)<br>1 (5)                                                        | NR                                                             | NR                                                                | NR                                                           |
| <b>AI444040</b><br><b>NCT 01359644</b><br><b>Sulkowski</b><br><b>NEJM 2015</b>                   | HCV 1, 2 and 3<br>Treatment naïve and<br>experienced<br>Without cirrhosis  | Cirrhotic<br>SIM + SOF 12 weeks<br><u>TN x 24 weeks</u><br>Grp A GT 1 SOF 7d+DCV+ SOF 23w<br>And Grp B GT2/3 SOF 7d then DCV<br>+SOF 23w<br>Grp C GT 1 DCV + SOF 24w and<br>Grp D GT 2/3DCV + SOF 24w<br>Grp E GT 1 DCV + SOF + RBV 24w<br>and Grp F GT 2/3 DCV + SOF + RBV<br>24w<br><u>HCV 1 TN x 12 weeks</u><br>Grp G GT 1 DCV + SOF 12w'<br>Grp H DCV + SOF+RBV 12w<br>Treatment experienced<br><u>HCV1 -TE</u><br>Grp I DCV + SOF 24w<br>Grp J DAC + SOF + RBV 24w | 23/0<br>31/0<br>28/0<br>29/1<br>41/0<br>41/0<br>21/0<br>20/0 | 1 (4)<br>2(6)<br>4(14)<br>2(7)<br>1(2)<br>0<br>0<br>1(5) | 1 (4)<br>9(29)<br>14(50)<br>9(31)<br>16(39)<br>15(37)<br>6(29)<br>9(45) | 5(22)<br>5(16)<br>8(29)<br>11(38)<br>14(34)<br>9(22)<br>7(33)<br>7(35) | 0<br>0<br>3 (10)<br>0<br>7(17)<br>0<br>3(15)                   | 0<br>5(16)<br>9(32)<br>9(31)<br>8(20)<br>8(20)<br>0<br>0<br>2(10) | 0<br>3(10)<br>4(14)<br>1(3)<br>0<br>6(15)<br>0<br>0<br>2(10) |
| <b>ALLY-1</b><br><b>NCT02032875</b><br><b>Poordad</b><br><b>Hepatology</b>                       | HCV 1-4 and 6<br>Pre and Post liver<br>transplant                          | Advanced cirrhosis<br>DCV +SOF+ RBV 12 w<br>Post-Transplant<br>DCV +SOF + RBV 12 w                                                                                                                                                                                                                                                                                                                                                                                       | 60/0<br>53/0                                                 | 10 (17)<br>5 (9)<br>No deaths                            | 11 (18)<br>15 (28)                                                      | 9 (15)<br>19 (36)                                                      | Hgb < 9<br>5 (8)<br>2 (4)                                      | 10 (17)<br>3 (6)                                                  | NR                                                           |
| <b>ALLY-2</b><br><b>NCT 02032888</b><br><b>Wyles</b><br><b>NEJM</b>                              | HCV 1-4<br>Treatment naïve and<br>experienced<br>WITH HIV co-<br>infection | TN: DCV + SOF 8w<br>TN: DCV+ SOF 12w<br>TE: DCV + SOF 12w                                                                                                                                                                                                                                                                                                                                                                                                                | 50/1<br>101/1<br>52/0                                        | 0<br>1 (1)<br>3 (6)                                      | 5 (10)<br>19 (19)<br>10 (19)                                            | 3 (6)<br>12 (12)<br>8 (15)                                             | NR                                                             | 4(8)<br>14(14)<br>8(15)                                           | 0<br>6 (6)<br>3 (6)                                          |

|                                                                                    |                                                                                                             |                                                                                                                 |                                      |                                                |                                          |                                          |                                                     |                                          |                                         |
|------------------------------------------------------------------------------------|-------------------------------------------------------------------------------------------------------------|-----------------------------------------------------------------------------------------------------------------|--------------------------------------|------------------------------------------------|------------------------------------------|------------------------------------------|-----------------------------------------------------|------------------------------------------|-----------------------------------------|
| <b>ALLY-3</b><br><b>NCT 02032901</b><br><b>Nelson</b><br><b>Hepatology 2015</b>    | HCV 3<br>Treatment naïve and<br>experienced<br>With or without<br>cirrhosis                                 | TN: DCV + SOF 12 w<br>TE: DCV + SOF 12 w                                                                        | 101/0<br>51/0                        | 1 (1)                                          | 29 (19)                                  | 30 (20)                                  | Hgb < 9<br>0                                        | 18 (12)                                  | NR                                      |
| <b>ALLY 3 Plus</b><br><b>NCT02319031</b><br><b>Leroy</b><br><b>Hepatology 2016</b> | HCV 3<br>Treatment naïve and<br>experienced<br>With advanced<br>fibrosis including<br>cirrhosis             | DCV + SOF+ RBV 12 w<br>DCV + SOF+ RBV 16 w                                                                      | 24/1<br>26/0                         | 2 (8)<br>1 death<br>3 (11)<br>0 deaths         | 6 (25)<br>7 (27)                         | 7 (29)<br>5 (19)                         | Grade 3-4<br>0 (-)<br>1 (4)                         | NR                                       | NR                                      |
| <b>LONESTAR</b><br><b>NCT 01726517</b><br><b>Lawitz</b><br><b>Lancet 2014</b>      | HCV 1<br>Treatment naïve and<br>experienced<br>With and without<br>cirrhosis                                | TN: LDV/SOF 8 w<br>TN: LDV/SOF + RBV 8 w<br>TN: LDV/SOF 12 w<br>TE: LDV-SOF 12 w<br>TE: LDV-SOF + RBV 12 w      | 20/0<br>21/0<br>19/1<br>19/0<br>21/0 | 0<br>1 (5)<br>1 (5)<br>1 (5)<br>1 (5)          | NR                                       | 2 (10)<br>3 (14)<br>0<br>1 (5)<br>1 (5)  | NR                                                  |                                          | 2 (10)<br>3 (14)<br>0<br>1 (5)<br>1 (5) |
| <b>ION-1</b><br><b>NCT 01701401</b><br><b>Afdhal,</b><br><b>NEJM 2014</b>          | HCV1<br>Treatment naïve<br>With and without<br>cirrhosis                                                    | LDV/SOF 12 w<br>LDV/SOF + RBV 12 w<br>LDV/SOF 24 w<br>LDV/SOF + RBV 24 w                                        | 214/ 2<br>217/ 4<br>217/ 2<br>217 /2 | 1 (<1)<br>7 (3)<br>18 (8)<br>7 (3)             | 44 (21)<br>79 (36)<br>53 (24)<br>82 (38) | 53 (25)<br>49 (23)<br>54 (25)<br>65 (30) | Hb (<10 g/dl)<br>0 (-)<br>20 (9)<br>0 (-)<br>16 (7) | 24 (11)<br>37 (17)<br>29 (13)<br>32 (15) | 16 (7)<br>21 (10)<br>16 (7)<br>27 (12)  |
| <b>ION-2</b><br><b>NCT 01768286</b><br><b>Afdhal,</b><br><b>NEJM 2014</b>          | HCV 1<br>Treatment experienced<br>With and without<br>cirrhosis                                             | LDV/SOF 12 w<br>LDV/SOF + RBV 12 w<br>LDV/SOF 24 w<br>LDV/SOF + RBV 24 w                                        | 109/0<br>111/0<br>109/2<br>111/1     | 0<br>0<br>6 (6)<br>3 (3)                       | 23 (21)<br>45 (41)<br>26 (24)<br>50 (45) | 28 (26)<br>26 (23)<br>25 (23)<br>35 (32) | Hb (<10 g/dl)<br>0 (-)<br>2 (2)<br>0 (-)<br>9 (8)   | 13 (12)<br>20 (18)<br>7 (6)<br>25 (23)   | 2 (2)<br>11 (10)<br>6 (6)<br>16 (14)    |
| <b>ION-3</b><br><b>NCT 01851330</b><br><b>Kowdley</b><br><b>NEJM 2014</b>          | HCV 1<br>Treatment naïve<br>Without cirrhosis                                                               | LDV/SOF 8 w<br>LDV/SOF + RBV 8 w<br>LDV/SOF 12 w                                                                | 215/ 1<br>216/ 5<br>216/ 7           | 4 (2)<br>1 (<1)<br>5 (2)                       | 45 (21)<br>75 (35)<br>49 (23)            | 30 (14)<br>54 (25)<br>33 (15)            | Hb (<10 g/dl)<br>0 (-)<br>11 (5)<br>1 (<1)          | 15 (7)<br>38 (18)<br>24 (11)             | 3 (1)<br>19 (9)<br>5 (2)                |
| <b>ION-4</b><br><b>NCT02073656</b><br><b>Naggie</b><br><b>NEJM 2015</b>            | HCV 1-4<br>Treatment naïve and<br>experienced<br>With and without<br>cirrhosis<br>With HIV co-<br>infection | LDV/SOF 12 w                                                                                                    | 335/1                                | 8 (2)                                          | 71 (21)                                  | 83 (25)                                  | NR                                                  | 33 (10)                                  | NR                                      |
| <b>SIRIUS</b><br><b>NCT 01965535</b><br><b>Bourliere</b><br><b>Lancet 2015</b>     | HCV 1<br>Treatment naïve<br>With cirrhosis                                                                  | LDV/SOF 24 w<br>LDV/SOF + RBV 12 w                                                                              | 78/0<br>77/0                         | 8 (10)<br>4 (5)                                | 15 (19)<br>7 (9)                         | 31 (40)<br>21 (27)                       | Hb (<10 g/dl)<br>1 (1)<br>2 (3)                     | 8 (10)<br>14 (18)                        | 4 (5)<br>12 (16)                        |
| <b>Gane</b><br><b>NCT 01826981.</b><br><b>Gastroenterology</b><br><b>2015</b>      | HCV 3 and 6<br>Treatment naïve and<br>experienced<br>With and without<br>cirrhosis                          | HCV3<br>TN- LDV/SOF 12 w<br>TN – LDV/SOF + RBV 12 w<br>TE – LDV/SOF + RBV 12 w<br>HCV 6<br>TN/TE – LDV/SOF 12 w | 25/0<br>26/0<br>50/0<br>25/0         | 4 (16)<br>0 (-)<br>1 (2)<br>1 (4)<br>No deaths | 5 (20)<br>2 (8)<br>13 (26)<br>6 (24)     | 10 (40)<br>8 (31)<br>13 (26)<br>2 (8)    | Hgb < 9<br>0<br>5 (19)<br>3 (6)<br>0                | 9 (36)<br>4 (15)<br>5 (10)<br>0          | 1 (4)<br>1 (4)<br>7 (14)<br>2 (8)       |



|                     |                               |                              |       |         |          |          |             |         |    |
|---------------------|-------------------------------|------------------------------|-------|---------|----------|----------|-------------|---------|----|
|                     |                               | LDV/SOF + RBV 24 w           | 5/0   | 2 (40)  | 1(20)    |          | 0           |         | 0  |
|                     |                               | Post-transplant- FCH         |       |         |          |          |             |         |    |
|                     |                               | LDV/SOF + RBV 12 w           | 3/0   | 2(67)   | 0        |          | 0           |         | 0  |
|                     |                               | LDV/SOF + RBV 24 w           | 3/1   | 1(50)   | 0        |          | 0           |         | 0  |
| <b>ASTRAL 1</b>     | HCV 1, 2,4 and 6              |                              |       |         |          |          | Hb <10 g/dl |         | NR |
| <b>NCT 02201940</b> | Treatment naïve and           | VEL/SOF 12w                  | 624/2 | 15 (2)  | 126 (20) | 182 (29) | 2 (<1)      | 75 (12) |    |
| <b>Feld</b>         | experienced                   | Placebo + Deferred treatment | 116/0 | 0       | 23 (20)  | 33 (28)  | 0 (-)       | 13 (11) |    |
| <b>NEJM 2015</b>    | With and without<br>cirrhosis |                              |       |         |          |          |             |         |    |
| <b>ASTRAL 2</b>     | HCV 2                         |                              |       |         |          |          | Hb <10 g/dl |         |    |
| <b>NCT 02220998</b> | Treatment naïve and           | VEL/SOF 12w                  | 134/0 | 2 (1)   | 20 (15)  | 24 (18)  | 0 (-)       | 14 (10) | NR |
| <b>Foster</b>       | experienced                   | SOF - RBV 12w                | 132/2 | 2 (2)   | 47 (36)  | 29 (22)  | 6 (5)       | 19 (14) |    |
| <b>NEJM 2015</b>    | With and without<br>cirrhosis |                              |       |         |          |          |             |         |    |
| <b>ASTRAL 3</b>     | HCV 3                         |                              |       |         |          |          | Hb <10 g/dl |         |    |
| <b>NCT 02201953</b> | Treatment naïve and           | VEL/SOF 12w                  | 277/2 | 6 (2)   | 71 (26)  | 90 (32)  | 0 (-)       | 46 (17) | NR |
| <b>Foster</b>       | experienced                   | SOF - RBV 24w                | 275/6 | 15 (2)  | 105 (38) | 89 (32)  | 10 (4)      | 58 (21) |    |
| <b>NEJM 2015</b>    | With and without<br>cirrhosis |                              |       |         |          |          |             |         |    |
| <b>ASTRAL 4</b>     | HCV 1-6                       |                              |       |         |          |          | Hb <10 g/dl |         |    |
| <b>NCT 02201901</b> | Decompensated                 | VEL/SOF 12w                  | 90/1  | 17 (19) | 23 (26)  | 23 (26)  | 7 (8)       | 22 (24) | NR |
| <b>Curry</b>        | cirrhosis (CTP class          | VEL/SOF- RBV 12w             | 87/0  | 14 (16) | 34 (39)  | 18 (21)  | 20 (23)     | 22 (25) |    |
| <b>NEJM 2015</b>    | B)                            | VEL/SOF 24w                  | 90/3  | 16 (18) | 21 (23)  | 17 (19)  | 8 (9)       | 18 (20) |    |

HCV = Hepatitis C Virus; TN = Treatment Naïve; TE = Treatment experienced; CTP = Child-Turcotte-Pugh; GZP = Grazoprevir; EBV = Elbasvir; RBV = Ribavirin; PTV/r = Paritaprevir/Ritonavir; OBV = Ombitasvir; DAV = Dasabuvir; SOF = Sofosbuvir; SIM = Simeprevir; DCV = Daclatasvir; LDV = Ledipasvir; VEL = Velpatasvir

**Table 3: Study characteristics and outcomes for HCV genotype 1 infection by clinical trial**

| Study                                       | Population included                                                                                    | DAA Regimen                                                                                                                                                                                                                       | SVR12 All HCV1                                                                                                                                                                                                                                                                    | SVR12 HCV1a                                                                                                                                                                                                                                 | SVR12 HCV1b                                                                                                                                                                                                                                     | Serious adverse events n (%)                            | Discontinuation (n)                                               |
|---------------------------------------------|--------------------------------------------------------------------------------------------------------|-----------------------------------------------------------------------------------------------------------------------------------------------------------------------------------------------------------------------------------|-----------------------------------------------------------------------------------------------------------------------------------------------------------------------------------------------------------------------------------------------------------------------------------|---------------------------------------------------------------------------------------------------------------------------------------------------------------------------------------------------------------------------------------------|-------------------------------------------------------------------------------------------------------------------------------------------------------------------------------------------------------------------------------------------------|---------------------------------------------------------|-------------------------------------------------------------------|
| <b>C-EDGE Zeuzem Annals 2015</b>            | HCV 1, 4, & 6<br>Treatment naïve<br>With and without cirrhosis                                         | GZP/EBV 12w<br>Placebo 12 w + Deferred treatment                                                                                                                                                                                  | NR                                                                                                                                                                                                                                                                                | 92% (95%CI 86-96)<br><br>SVR by presence of baseline NS5A RASs<br>Without NS5A RASs 99%(133/135)<br><br>With NS5A RASs 58% (11/19)                                                                                                          | 99% (95%CI 95-100)                                                                                                                                                                                                                              | 9(3)<br>3(3)                                            | NR                                                                |
| <b>C-EDGE TE Kwo Gastroenterology 2016</b>  | HCV 1, 4, & 6<br>Treatment experienced<br>With and without cirrhosis<br>With and without HIV infection | GZP/EBV 12w<br>GZP/EBV +RBV 12w<br>GZP/ EBV 16w<br>GZP/EBV +RBV 16w                                                                                                                                                               |                                                                                                                                                                                                                                                                                   | All Patients 92% (55/60)<br>93% (56/60)<br>94% (45/48)<br>100% (55/55)<br><br>SVR by presence of baseline NS5A RAVs<br>Without With<br>98% (49/50) 60% (6/10)<br>98% (50/51) 67% (6/9)<br>100% (42/42) 50% (3/6)<br>100% (49/49) 100% (6/6) | All Patients 100% (34/34)<br>97% (28/29)<br>98% (46/47)<br>100% (37/37)<br><br>SVR by presence of baseline NS5A RAVs<br>Without With<br>100%(30/30) 100% (4/4)<br>100% (24/24) 80% (4/5)<br>100% (35/35) 92% (11/12)<br>100% (28/28) 100% (9/9) | 4 (4)<br>3 (3)<br>3 (3)<br>4 (4)                        | 1 (1)<br>1 (1)<br>0<br>5 (5)                                      |
| <b>C-WORTHY Lawitz Lancet 2015</b>          | HCV 1<br>Treatment naïve or experienced<br>With and without cirrhosis                                  | Treatment naïve with cirrhosis<br>GZP/EBV12w<br>GZP/EBV + RBV 12w<br>GZP/EBV 18w<br>GZP/EBV + RBV 18w<br><br>Treatment experienced<br>W/Without cirrhosis<br>GZP/EBV 12w<br>GZP/EBV + RBV 12w<br>GZP/EBV 18w<br>GZP/EBV + RBV 18w | <u>All patients</u><br>95% (95%CI 91 - 97)<br><u>With cirrhosis</u><br>97% (95%CI 82- 100)<br>90% (95%CI 74-98)<br>94% (95%CI 79-99)<br>97% (95%CI 84-100)<br><br><u>Without cirrhosis</u><br>91% (95%CI 76-98)<br>94% (95%CI 79-99)<br>100% (95%CI 89-100)<br>97% (95%CI 84-100) | Data not given for HCV1a and HCV 1b separately                                                                                                                                                                                              | Data not given for HCV1a and HCV 1b separately                                                                                                                                                                                                  | 2 (7)<br>0<br>0<br>1 (3)<br>1(3)<br>2 (6)<br>1 (3)<br>0 | <u>Treatment naïve</u><br>0<br><br><u>Previously treated</u><br>1 |
| <b>PEARL I Lawitz Gastroenterology 2015</b> | HCV 1b<br>Treatment naïve or experienced<br>With and without cirrhosis                                 | Without cirrhosis<br>TN: PTV/r/OBV + RBV 12w<br>TE: PTV/r/OBV + RBV 12w<br>With cirrhosis<br>TN: PTV/r/OBV + RBV 24w<br>TE: PTV/r/OBV + RBV 24w                                                                                   | NA                                                                                                                                                                                                                                                                                | NA                                                                                                                                                                                                                                          | With cirrhosis<br>98% (95%CI 89-100)<br>96% (95%CI 87-99)<br><br>Without cirrhosis<br>95% (95%CI 84-99)<br>90% (36/40; CI, 76-97)                                                                                                               | 1<br>1<br>3<br>2                                        | 0<br>0<br>3<br>0                                                  |

|                                                            |                                                                  |                                                                                                                                     |                                                                                        |                                                                                       |                                                                                  |                                           |                          |
|------------------------------------------------------------|------------------------------------------------------------------|-------------------------------------------------------------------------------------------------------------------------------------|----------------------------------------------------------------------------------------|---------------------------------------------------------------------------------------|----------------------------------------------------------------------------------|-------------------------------------------|--------------------------|
| <b>PEARL II<br/>Andreone<br/>Gastroenterology<br/>2014</b> | HCV 1b<br>Treatment<br>experienced<br>Without cirrhosis          | PTV/r/OBV + DAV + RBV 12w<br>PTV/r/OBV + DAV+ Plac 12w                                                                              | NA                                                                                     | NA                                                                                    | 97% (95%CI 93-100)                                                               | 2 (2)                                     | 2                        |
|                                                            |                                                                  |                                                                                                                                     |                                                                                        |                                                                                       | 100% (95%CI 96-100)                                                              | 2 (2)                                     | 0                        |
|                                                            |                                                                  |                                                                                                                                     |                                                                                        |                                                                                       | (All without cirrhosis)                                                          |                                           |                          |
| <b>PEARL III<br/>Ferenci<br/>NEJM 2014</b>                 | HCV 1b<br>Treatment naïve<br>Without cirrhosis                   | PTV/r/OBV + DAV + RBV 12w<br>PTV/r/OBV + DAV + Plac 12w                                                                             | NA                                                                                     | NA                                                                                    | 99% (95%CI 99-100)                                                               | 2 (1)                                     | 0                        |
|                                                            |                                                                  |                                                                                                                                     |                                                                                        |                                                                                       | 99% (95%CI 98-100)                                                               | 1 (0.5)                                   | 0                        |
|                                                            |                                                                  |                                                                                                                                     |                                                                                        |                                                                                       | (All without cirrhosis )                                                         |                                           |                          |
| <b>PEARL IV<br/>Ferenci<br/>NEJM 2014</b>                  | HCV 1a<br>Treatment<br>experienced<br>Without cirrhosis          | PTV/r/OBV + DAV + RBV 12w<br>PTV/r/OBV + DAV + Plac 12w                                                                             | NA                                                                                     | 97% (95%CI 94-100)                                                                    | NA                                                                               | 2 (2)                                     | 0                        |
|                                                            |                                                                  |                                                                                                                                     |                                                                                        | 90% (95%CI 87-94)                                                                     |                                                                                  | 4 (2)                                     | 3                        |
| <b>SAPPHIRE I<br/>Feld<br/>NEJM 2014</b>                   | HCV 1<br>Treatment naïve<br>Without cirrhosis                    | PTV/r/OBV + DAV + RBV 12w<br>Placebo + Deferred treatment                                                                           | 96% (95%CI 94-98)                                                                      | 95% (95%CI 93-99)                                                                     | 98% (95%CI 96 -100)                                                              | 10 (2)                                    | 3                        |
|                                                            |                                                                  |                                                                                                                                     | (All without cirrhosis)                                                                | (All without cirrhosis)                                                               |                                                                                  | (All without cirrhosis)                   | 0                        |
| <b>SAPPHIRE II<br/>Zeuzem<br/>NEJM 2014</b>                | HCV 1<br>Treatment<br>experienced<br>Without cirrhosis           | PTV/r/OBV + DAV + RBV 12w<br>Placebo + 12 w open label<br>active regimen                                                            | 97% (95%CI 94-98)                                                                      | 96% (95%CI 93-99)                                                                     | 97% (95%CI 94-100)                                                               | 6                                         | 5                        |
|                                                            |                                                                  |                                                                                                                                     | (All without cirrhosis)                                                                | (All without cirrhosis)                                                               |                                                                                  | (All without cirrhosis)                   | (2)                      |
| <b>TURQUOISE II<br/>Poordad<br/>NEJM 2014</b>              | HCV 1<br>Treatment naïve<br>and experienced<br>With cirrhosis    | PTV/r/OBV + DAV + RBV 12w<br>PTV/r/OBV + DAV + RBV 24w                                                                              | 92%(95% CI 88-96)                                                                      | 88.6%                                                                                 | 98.5%                                                                            | 13 (6) –<br>1 death<br>8 (5) -<br>0 death | NR                       |
|                                                            |                                                                  |                                                                                                                                     | 96% (95% CI 92-99)<br>P=0.09                                                           | 94.2%                                                                                 |                                                                                  |                                           |                          |
| <b>COSMOS Lawitz<br/>Lancet 2014</b>                       | HCV 1<br>Treatment naïve<br>and experienced                      | Previous non-responders<br>METAVIR F0-F1<br>SIM + SOF + RBV 12 w<br>SIM + SOF 12 w<br>SIM + SOF + RBV 24 w<br>SIM + SOF 24 w        |                                                                                        | Cohort 1<br><u>HCV 1a</u><br>95% (20/21)<br>90% (9/10)<br>75% (15/20)<br>100% (11/11) | Cohort 1<br><u>HCV 1b</u><br>100% (6/6)<br>100% (4/4)<br>100% (4/4)<br>75% (3/4) | 0<br>0<br>1 (3)<br>3 (6)                  | 0<br>0<br>2 (7)<br>2 (4) |
|                                                            |                                                                  | Non responders + TN with<br>METAVIR score F3-F4<br>SIM + SOF + RBV 12 w<br>SIM + SOF 12 w<br>SIM + SOF + RBV 24 w<br>SIM + SOF 24 w | Cohort 2<br><u>HCV 1a</u><br>91% (20/22)<br>91% (10/11)<br>96% (20/23)<br>100% (12/12) | Cohort 2<br><u>HCV 1b</u><br>100% (5/5)<br>100% (3/3)<br>86% (6/7)<br>100% (4/4)      |                                                                                  |                                           |                          |
| <b>OPTIMIST 1<br/>Kwo<br/>Hepatology 2016</b>              | HCV 1<br>Treatment naïve<br>and experienced<br>Without cirrhosis | SIM + SOF 8 w<br>SIM + SOF 12 w                                                                                                     | 83% (95%CI 76-89)                                                                      | 79% (95%CI 72-87)                                                                     | 92% (95%CI 79-98)                                                                | 1                                         | 0                        |
|                                                            |                                                                  |                                                                                                                                     | 97% (95%CI 94-100)                                                                     | 97% (95%CI 93-100)                                                                    |                                                                                  | 97% (95%CI 87-100)                        | 3                        |

|                                                  |                                                                              |                                                                                                                                                                      |                                                                                                                                                        |                                                                                                |                                                                                        |                                                  |                       |
|--------------------------------------------------|------------------------------------------------------------------------------|----------------------------------------------------------------------------------------------------------------------------------------------------------------------|--------------------------------------------------------------------------------------------------------------------------------------------------------|------------------------------------------------------------------------------------------------|----------------------------------------------------------------------------------------|--------------------------------------------------|-----------------------|
| <b>OPTIMIST 2<br/>Lawitz<br/>Hepatology 2016</b> | HCV 1<br>Treatment naïve<br>and experienced<br>With cirrhosis                | SIM + SOF 12 w                                                                                                                                                       | 83% (95%CI 76-91)<br>TN<br>88% (95% CI 78-98)<br>TE<br>79% (95% CI 67-91)                                                                              | 83% (95% CI 74-93)<br>Q80K present<br>74% (95% CI 57-90)<br>Q80K absent<br>92% (95% CI 82-100) | 84% (95% CI 69-98%)                                                                    | 5(5)                                             | 3                     |
| <b>AI444040<br/>Sulkowski<br/>NEJM 2014</b>      | HCV 1, 2 and 3<br>Treatment naïve<br>and experienced<br>Without cirrhosis    | HCV1 - TN<br>Grp ASOD 7d then DCV+ SOF<br>23w<br>Grp C DCV + SOF 24w<br>Grp E DCV + SOF + RBV 24w<br>Grp G DCV + SOF 12w<br>Grp H DCV + SOF+RBV 12w                  | HCV 1 TN<br>100% (15/15)<br>100% (14/14)<br>100% (15/15)<br>100% (41/41)<br>95% (39/41)                                                                | 98% (129/132)                                                                                  | 100% (35/35)                                                                           | Unclear<br>Unclear<br>Unclear<br>1 (2)<br>0<br>0 | 0<br>1<br>0<br>0<br>0 |
| <b>LONESTAR<br/>Lawitz<br/>Lancet 2014</b>       | HCV 1<br>Treatment naïve<br>and experienced<br>With and without<br>cirrhosis | HCV1 -TE<br>Grp I DCV + SOF 24w<br>Grp J DCV+ SOF + RBV 24w<br>TN LDV/SOF 8 w<br>TN LDV/SOF + RBV 8 w<br>TN LDV/SOF 12 w<br>TE LDV/SOF 12 w<br>TE LDV/SOF + RBV 12 w | HCV 1 TE<br>100% (21/21)<br>95% (19/20)<br>95% (95%CI 75-100)<br>100% (95%CI 84-100)<br>95% (95%CI 74-100)<br>95% (95%CI 74-100)<br>95% (95%CI 84-100) | SVR not reported by<br>subtype or cirrhosis status                                             | SVR not reported by<br>subtype or cirrhosis status                                     | 0<br>1(5)<br>0<br>1 (5)<br>1 (5)<br>1 (5)        | 0<br>0<br>NR<br>1 (5) |
| <b>ION-1<br/>Afdhal,<br/>NEJM 2014</b>           | HCV 1<br>Treatment naïve<br>With and without<br>cirrhosis                    | LDV/SOF 12 w<br>LDV/SOF + RBV 12 w<br>LDV/SOF 24 w<br>LDV/SOF + RBV 24 w                                                                                             | 99% (95%CI 96-100)<br>97%; (95%CI 94-99)<br>98%; (95%CI 95-99)<br>99%; (95%CI 97-100)                                                                  | 99 % (95%CI 96-100)<br>100% (95%CI 97-100)<br>100% (95%CI 97-100)<br>100% (95%CI 97-100)       | 100% (95%CI 94-100)<br>100% (95%CI 94-100)<br>97% (95%CI 90-97)<br>100% (95%CI 95-100) | 1 (<1)<br>7 (3)<br>18 (8)<br>7 (3)               | 0<br>0<br>4<br>6      |
|                                                  |                                                                              |                                                                                                                                                                      | <u>With cirrhosis</u><br>97% (95%CI 84- 100)<br>100% (95%CI 89-100)<br>97% (95%CI 84-100)<br>100% (95%CI 90-100)                                       | SVR not reported by<br>cirrhosis status on subtype                                             | SVR not reported by<br>cirrhosis status on<br>subtype                                  |                                                  |                       |
|                                                  |                                                                              |                                                                                                                                                                      | <u>Without cirrhosis</u><br>100% (95%CI 98-100)<br>100% (95%CI 98-100)<br>99% (95%CI 97-100)<br>100% (95%CI 98-100)                                    |                                                                                                |                                                                                        |                                                  |                       |

|                                                          |                                                                                          |                              |                              |                                                    |                                                    |        |    |
|----------------------------------------------------------|------------------------------------------------------------------------------------------|------------------------------|------------------------------|----------------------------------------------------|----------------------------------------------------|--------|----|
| <b>ION-2</b><br><b>Afdhal,</b><br><b>NEJM 2014</b>       | HCV 1<br>Treatment<br>experienced<br>With and without<br>cirrhosis                       | LDV/SOF 12 w                 | 94% (95%CI 87-97)            | 95% (95%CI 88- 99)                                 | 87% (95%CI 66 -97)                                 | 0      | 0  |
|                                                          |                                                                                          | LDV/SOF + RBV 12 w           | 96% (95%CI 91-99)            | 95% (95%CI 89- 99)                                 | 100% (95%CI 85-100)                                | 0      |    |
|                                                          |                                                                                          | LDV/SOF F 24 w               | 99% (95%CI 95-99)            | 99% (95%CI 94- 100)                                | 100% (95%CI 86-100)                                | 6 (6)  |    |
|                                                          |                                                                                          | LDV/SOF + RBV 24 w           | 99% (95%CI 95-99)            | 99% (95%CI 94- 100)                                | 100% (95%CI 85-100)                                | 3 (3)  |    |
|                                                          |                                                                                          | <u>With cirrhosis</u>        | 86% (95%CI 65-97)            | SVR not reported by<br>cirrhosis status on subtype | SVR not reported by<br>cirrhosis status on subtype |        |    |
|                                                          |                                                                                          |                              | 82% (95%CI 60-95)            |                                                    |                                                    |        |    |
|                                                          |                                                                                          |                              | 100% (95%CI 85-100)          |                                                    |                                                    |        |    |
|                                                          |                                                                                          |                              | 100% (95%CI 85-100)          |                                                    |                                                    |        |    |
|                                                          |                                                                                          | <u>Without cirrhosis</u>     | 95% (95%CI 89- 99)           |                                                    |                                                    |        |    |
|                                                          |                                                                                          |                              | 100% (95%CI 96- 100)         |                                                    |                                                    |        |    |
|                                                          |                                                                                          |                              | 99% (95%CI 94- 99)           |                                                    |                                                    |        |    |
|                                                          |                                                                                          |                              | 99% (95%CI 94- 99)           |                                                    |                                                    |        |    |
| <b>ION-3</b><br><b>Kowdley,</b><br><b>NEJM 2014</b>      | HCV 1<br>Treatment naïve<br>Without cirrhosis.                                           | LDV/SOF 8 w                  | 94% (95%CI 90-97)            | 93% (95%CI 88-97)                                  | 98% (95%CI 88-100)                                 | 4 (2)  | 0  |
|                                                          |                                                                                          | LDV/SOF + RBV 8 w            | 93% (95%CI 89-96)            | 92% (95%CI 87-96)                                  | 95% (95%CI 84-99)                                  | 1 (<1) | 1  |
|                                                          |                                                                                          | LDV/SOF 12 w                 | 95% (95%CI 92-98)            | 95% (95%CI 90 -98)                                 | 98% (95%CI 88-100)                                 | 5 (2)  | 2  |
| <b>SIRIUS</b><br><b>Bourliere,</b><br><b>Lancet 2015</b> | HCV 1<br>Treatment<br>experienced<br>With cirrhosis                                      | LDV/SOF 24 w                 | 97% (95%CI 91-99)            | Data not given for HCV1a<br>and HCV 1b separately  | Data not given for HCV1a<br>and HCV 1b separately  | 8 (10) | NR |
|                                                          |                                                                                          | LDV/SOF + RBV 12 w           | 96% (95%CI 89-99)            |                                                    |                                                    | 4 (5)  |    |
| <b>ASTRAL 1</b><br><b>Feld</b><br><b>NEJM 2015</b>       | HCV 1, 2,4 and 6<br>Treatment naïve<br>and experienced,<br>with and without<br>cirrhosis | VEL/SOF 12w                  | <u>All HCV 1</u>             | <u>All HCV 1a</u>                                  | <u>All HCV 1b</u>                                  | 15 (2) | 1  |
|                                                          |                                                                                          | Placebo +Deferred treatment  | 98.5% (95%CI 96-99)          | 98% (95%CI 95- 99)                                 | 99% (95%CI 95- 100)                                | 0      |    |
|                                                          |                                                                                          | VEL/SOF                      | <u>With cirrhosis</u>        | <u>With cirrhosis</u>                              | <u>With cirrhosis</u>                              |        |    |
|                                                          |                                                                                          |                              | 99% (95%CI 95-100)           | 100% (95%CI 93-100)                                | 96% (95%CI 79-100)                                 |        |    |
|                                                          |                                                                                          |                              | <u>Without cirrhosis</u>     | <u>Without cirrhosis</u>                           | <u>without cirrhosis</u>                           |        |    |
|                                                          |                                                                                          |                              | 99% (95%CI 97-98)            | 98% (95%CI 94-99)                                  | 100% (95%CI 96-100)                                |        |    |
|                                                          |                                                                                          | <u>Treatment naïve</u>       | <u>Treatment naïve</u>       | <u>Treatment naïve</u>                             |                                                    |        |    |
|                                                          |                                                                                          | 99% (95%CI 97-100)           | 97% (95%CI 92-99)            | 100% (95%CI 95-100)                                |                                                    |        |    |
|                                                          |                                                                                          | <u>Treatment Experienced</u> | <u>Treatment Experienced</u> | <u>Treatment experienced</u>                       |                                                    |        |    |
|                                                          |                                                                                          | 99.5% (95%CI 97-100)         | 100% (95%CI 95-100)          | 97% (95%CI 84-100)                                 |                                                    |        |    |



**Table 4: Study characteristics and outcomes for HCV genotypes 2-4 infection by clinical trial**

| Study                                        | Population included                                                     | DAA Regimen                          | SVR12 HCV2                                        | SVR12 HCV3                                                                                                                                                                              | SVR12 HCV4                                      | Serious adverse events n (%) | Discontinuation (n) |
|----------------------------------------------|-------------------------------------------------------------------------|--------------------------------------|---------------------------------------------------|-----------------------------------------------------------------------------------------------------------------------------------------------------------------------------------------|-------------------------------------------------|------------------------------|---------------------|
| <b>OSIRIS Raziky J. Viral hepatitis 2016</b> | HCV 4<br>Treatment naïve and experienced with and without cirrhosis     | Non cirrhotic<br>SIM + SOF 8w        | NA                                                | NA                                                                                                                                                                                      | 75% ( 95% CI 51-91)<br>(15/20)                  | 0                            | 0                   |
|                                              |                                                                         | SIM + SOF 12w                        |                                                   |                                                                                                                                                                                         | 100% (95% CI 83-100)<br>(20/20)                 | 0                            |                     |
|                                              |                                                                         | Cirrhotic<br>SIM + SOF 12w           |                                                   |                                                                                                                                                                                         | 100% (95% CI 85-100)<br>(23/23)                 | 1 (2)                        |                     |
| <b>ALLY-2 Wyles NEJM 2015</b>                | HCV 1-4 and<br>Treatment naïve and experienced<br>With HIV co-infection | TN DCV + SOF 8w                      | 83% (5/6 CI, 36-99)                               | 67% (2/3 CI, 9-99)                                                                                                                                                                      | NA                                              | NR                           | NR                  |
|                                              |                                                                         | TN DCV + SOF 12w                     | 100% (11/11 CI, 71-100)                           | 100% (6/6 CI, 54-100)                                                                                                                                                                   | 100% (2/2 CI, 16-100)                           |                              |                     |
|                                              |                                                                         | TE DCV + SOF 12w                     | 100% (2/2 CI, 16-100)                             | 100% (4/4 CI, 40-100)                                                                                                                                                                   | 100% (1/1 CI, 2.5-100)                          |                              |                     |
| <b>ALLY-3 Nelson Hepatology 2015</b>         | HCV 3<br>Treatment naïve and experienced<br>With and without cirrhosis  | TN DCV + SOF 12w                     | NA                                                | 90% (95%CI 83-95)                                                                                                                                                                       | NA                                              |                              | 0                   |
|                                              |                                                                         | TE DCV + SOF 12w                     |                                                   | 86% (95%CI 74-94)                                                                                                                                                                       |                                                 |                              | 0                   |
| <b>ALLY-3 + Leroy Hepatology 2016</b>        | HCV 3<br>Treatment naïve and experienced<br>With advanced fibrosis      | DCV + SOF + RBV 12w                  | NA                                                | Advanced fibrosis/cirrhosis<br>88% (95%CI 68-97)                                                                                                                                        | NA                                              | 2 (8)                        | 0                   |
|                                              |                                                                         | DCV + SOF + RBV 16w                  |                                                   | 92% (95%CI 75-99)                                                                                                                                                                       |                                                 | 3 (11)                       | 0                   |
|                                              |                                                                         |                                      |                                                   | 100% (14/14) with advanced fibrosis achieved SVR<br><br>Among patients with cirrhosis<br>Overall 86% (31/36)<br>12 weeks 83% (15/18)<br>16 weeks 89% (16/18)<br>89% with or without RBV |                                                 |                              |                     |
| <b>A1444040 Sulkowski NEJM 2014</b>          | HCV 1, 2 and 3<br>Treatment naïve and experienced without cirrhosis     | HCV2/3 TN                            | 92% with or without RBV (24/26)                   | 89% with or without RBV                                                                                                                                                                 | NA                                              | Unclear                      | 0                   |
|                                              |                                                                         | DCV + SOF 23w                        |                                                   |                                                                                                                                                                                         |                                                 |                              | 1                   |
|                                              |                                                                         | DCV + SOF 24w<br>DCV + SOF + RBV 24w |                                                   |                                                                                                                                                                                         |                                                 |                              | 0                   |
| <b>ASTRAL 1 Feld NEJM 2015</b>               | HCV 1, 2,4 and 6<br>Treatment naïve and experienced<br>With and without | VEL/SOF 12w                          | <u>All HCV 2</u><br>100% (95%CI 96- 100)          | NR                                                                                                                                                                                      | <u>All HCV 4</u><br>100 % (95%CI 97-100)        | 15 (2)                       | 1                   |
|                                              |                                                                         | Placebo +Deferred treatment SOF+VEL  | <u>With cirrhosis</u><br>100% (95%CI 69 -100)     |                                                                                                                                                                                         | <u>With cirrhosis</u><br>100% (95%CI 87 -100)   | 0                            |                     |
|                                              |                                                                         |                                      | <u>without cirrhosis</u><br>100% (95%CI 96 – 100) |                                                                                                                                                                                         | <u>Without cirrhosis</u><br>100% (95%CI 96-100) |                              |                     |

|                                                        | cirrhosis                                                                                              |                                                                                        |  | <u>Treatment naïve</u><br>100% (95%CI 95-100)       |                                                                                                                                                          | <u>Treatment naïve</u><br>100%(95%CI 94-100)                                                                                                                                                                              |                                  |                              |
|--------------------------------------------------------|--------------------------------------------------------------------------------------------------------|----------------------------------------------------------------------------------------|--|-----------------------------------------------------|----------------------------------------------------------------------------------------------------------------------------------------------------------|---------------------------------------------------------------------------------------------------------------------------------------------------------------------------------------------------------------------------|----------------------------------|------------------------------|
|                                                        |                                                                                                        |                                                                                        |  | <u>Treatment Experienced</u><br>100% (95%CI 86-100) |                                                                                                                                                          | <u>Treatment Experienced</u><br>100% (95%CI 93-100)                                                                                                                                                                       |                                  |                              |
| <b>ASTRAL 2<br/>Foster<br/>NEJM 2015</b>               | HCV 2<br>Treatment naïve and experienced<br>With and without cirrhosis                                 | VEL/SOF 12w<br>SOF + RBV 12w                                                           |  | 99% (95%CI 96-100)<br>94% (95%CI 88-97)             | NA                                                                                                                                                       | NA                                                                                                                                                                                                                        | 2 (1)<br>2 (2)                   | 1<br>2                       |
| <b>ASTRAL 3<br/>Foster<br/>NEJM 2015</b>               | HCV 3<br>Treatment naïve and experienced<br>With and without cirrhosis                                 | VEL/SOF 12w<br>SOF + RBV 24w                                                           |  | NA                                                  | 95% (95%CI 92-98)<br>80% (95%CI 75-85)                                                                                                                   | NA                                                                                                                                                                                                                        | 6 (2)<br>15 (2)                  | 2<br>9                       |
| <b>Gane<br/>Gastroenterology<br/>2015</b>              | HCV 3 and 6<br>Treatment naïve and experienced<br>With and without cirrhosis                           | TN LDV/SOF 12w<br>TN LDV/SOF + RBV 12w<br><br>TE LDV/SOF + RBV 12w                     |  | NA                                                  | 91% (95%CI 83-96)<br>66% (95%CI 55-76)<br><u>without cirrhosis</u><br>97% (95%CI 93-99)<br>87% (95%CI 81-92)<br>64% (95%CI 43-82)<br>100% (95%CI 87-100) | NA                                                                                                                                                                                                                        | 4<br>0<br><br>1                  | 1<br>0<br><br>1              |
| <b>C-EDGE Zeuzem<br/>Annals 2015</b>                   | HCV 1, 4, & 6<br>Treatment naïve<br>With and without cirrhosis                                         | (1 other arm for HCV6 without RBV)<br>GZP/ELB 12w<br>Placebo 12 w + Deferred treatment |  | NA                                                  | NA                                                                                                                                                       | 100% (18/18 95%CI 82 - 100)                                                                                                                                                                                               | 9(3)<br>3(3)                     | NR                           |
| <b>C-EDGE TE<br/>Kwo<br/>Gastroenterology<br/>2016</b> | HCV 1, 4, & 6<br>Treatment experienced<br>With and without cirrhosis<br>With and without HIV infection | GZP/EBV 12w<br>GZP/EBV +RBV 12w<br>GZP/EBV 16w<br>GZP/EBV +RBV 16w                     |  | NA                                                  | NA                                                                                                                                                       | All Patients<br>88% (7/8)<br>93% (14/15)<br>60% (3/5)<br>100% (8/8)                                                                                                                                                       | 4 (4)<br>3 (3)<br>3 (3)<br>4 (4) | 1 (1)<br>1 (1)<br>0<br>5 (5) |
| <b>PEARL I<br/>Hezode<br/>Lancet 2015</b>              | HCV 4<br>Treatment naïve and experienced<br>Without cirrhosis                                          | TN PTV/r/OBV 12w<br>TN PTV/r/OBV+ RBV 12w<br>TE PTV/r/OBV+ RBV 12w                     |  | NA                                                  | NA                                                                                                                                                       | SVR by presence of baseline NS5A RAVs<br>Without With<br>86%(6/7) 100% (1/1)<br>92% (11/12) 100% (3/3)<br>100% (3/3) 0% (0/2)<br>100% (7/7) 100% (1/1)<br>91% (95%CI 78-97)<br>100% (95%CI 92-100)<br>100% (95%CI 93-100) | 2<br>0<br>0                      | 0<br>0<br>1                  |

|                                    |                                                                                    |             |    |    |                                                                             |         |   |
|------------------------------------|------------------------------------------------------------------------------------|-------------|----|----|-----------------------------------------------------------------------------|---------|---|
| <b>Kohli<br/>Lancet 2014</b>       | HCV 4<br>Treatment<br>naïve and<br>experienced<br>With and<br>without<br>cirrhosis | LDV/SOF 12w | NA | NA | 95% (95%CI 76-100)<br><br>SVRs not given for sub-<br>populations separately | 10 (48) | 1 |
| <b>Abergel<br/>Hepatology 2016</b> | HCV 4<br>Treatment<br>naïve and<br>experienced<br>With and<br>without<br>cirrhosis | LDV/SOF 12w | NA | NA | 93% (95% CI 81-99)                                                          | 0       | 0 |

**Table 5: Study characteristics and outcomes for HCV genotypes 5 and 6 infection by clinical trial**

| Study                                      | Population included                                                                                    | DAA Regimen                                                         | SVR12 HCV5                                                                                                                                                                                                                                                   | SVR12 HCV6                                                                                                                                                                                                                                                                  | Serious adverse events n (%)     | Discontinuation (n)          |
|--------------------------------------------|--------------------------------------------------------------------------------------------------------|---------------------------------------------------------------------|--------------------------------------------------------------------------------------------------------------------------------------------------------------------------------------------------------------------------------------------------------------|-----------------------------------------------------------------------------------------------------------------------------------------------------------------------------------------------------------------------------------------------------------------------------|----------------------------------|------------------------------|
| <b>C-EDGE Zeuzem Annals 2015</b>           | HCV 1,4,& 6<br>Treatment naïve<br>With and without cirrhosis                                           | GZP/ELB 12w<br>Placebo 12 w to GZP + ELB 12w                        | NA                                                                                                                                                                                                                                                           | (8/10) 80% (95%CI 44-98)(8/10)                                                                                                                                                                                                                                              | 9(3)<br>3(3)                     | NR                           |
| <b>C-EDGE TE Kwo Gastroenterology 2016</b> | HCV 1, 4, & 6<br>Treatment experienced<br>With and without cirrhosis<br>With and without HIV infection | GZP/EBV 12w<br>GZP/EBV +RBV 12w<br>GZP/ EBV 16w<br>GZP/EBV +RBV 16w |                                                                                                                                                                                                                                                              | None<br>none<br>100% (2/2)<br>100% (2/2)                                                                                                                                                                                                                                    | 4 (4)<br>3 (3)<br>3 (3)<br>4 (4) | 1 (1)<br>1 (1)<br>0<br>5 (5) |
| <b>ASTRAL 1 Feld NEJM 2015</b>             | HCV 1, 2,4 and 6<br>Treatment naïve and experienced, with and without cirrhosis                        | VEL/SOF 12w<br>Placebo (+Deferred treatment SOF+VEL)                | <u>All HCV 5</u><br>97% (95%CI 85- 100)<br><br><u>With cirrhosis</u><br>100% (95%CI 48 -100)<br><u>without cirrhosis</u><br>97% (95%CI 82 – 100)<br><br><u>Treatment naïve</u><br>100% (95%CI 95-100)<br><u>Treatment Experienced</u><br>100% (95%CI 86-100) | <u>All HCV 6</u><br>100% (95%CI 91 – 100)<br><br><u>HCV 6 With cirrhosis</u><br>100% (95%CI 54 -100)<br><u>HCV 6 without cirrhosis</u><br>100% (95%CI 90 – 100)<br><br><u>Treatment naïve</u><br>100% (95%CI 91-100)<br><u>Treatment Experienced</u><br>100% (95%CI 29-100) | 15 (2)<br>0                      | 1                            |
| <b>Gane Gastroenterology 2015</b>          | HCV 3 and 6<br>Treatment naïve and experienced<br>With and without cirrhosis                           | LDV /SOF 12 w<br><br>(3 other arms for HCV3 with and without RBV)   | NA                                                                                                                                                                                                                                                           | 96% (95%CI 80-100)<br><br>SVR not reported by cirrhosis status                                                                                                                                                                                                              | 1                                | 0                            |
| <b>Abergel Lancet 2016</b>                 | HCV 5<br>Treatment naïve and experienced<br>With and without cirrhosis                                 | LDV /SOF 12w                                                        | 95% (95%CI 83-99)<br><br><u>With cirrhosis</u><br>89% (8/9)<br><u>without cirrhosis</u><br>97% (31/32)<br><br><u>Treatment naïve</u><br>95% (95%CI 76-100)<br><u>Treatment experienced</u><br>95% (95%CI 75-100)                                             | NA                                                                                                                                                                                                                                                                          | 1                                | 0                            |

**Table 6: Study characteristics and outcomes for subpopulations by clinical trial**

| Study                                  | Population included                                                                    | DAA Regimen                | SVR all study       | SVR other                                                                    | SVR other           | Serious adverse events n (%) | Discontinuation (n) |
|----------------------------------------|----------------------------------------------------------------------------------------|----------------------------|---------------------|------------------------------------------------------------------------------|---------------------|------------------------------|---------------------|
| <b>C-WORTHY Sulkowski Lancet 2015</b>  | HCV 1                                                                                  | Monoinfected               | 80% (95%CI 61-92)   | NA                                                                           | NA                  | 0                            | 0                   |
|                                        | Treatment naïve                                                                        | GZP/EBV +RBV 8w            | 93% (95%CI 85 -97)  |                                                                              |                     | 1 (1)                        |                     |
|                                        | With and without cirrhosis                                                             | GZP/EBV +RBV 12w           | 98% (95%CI 88- 100) |                                                                              |                     | 0                            |                     |
|                                        | With and without HIV coinfection                                                       | GZP/EBV 12w                |                     |                                                                              |                     |                              |                     |
|                                        |                                                                                        | Coinfected                 | 97% (95%CI 82- 100) |                                                                              |                     | 1 (3)                        |                     |
|                                        |                                                                                        | GZP/EBV +RBV 12w           | 87% (95%CI 69- 96)  |                                                                              |                     | 1 (3)                        |                     |
|                                        |                                                                                        | GZP/EBV 12w                |                     |                                                                              |                     |                              |                     |
| <b>C-EDGE Rockstroh Lancet 2015</b>    | HCV 1-4-6*                                                                             | GZP/EBV 12w                | 96% (95%CI 93-98)   | NA                                                                           | NA                  | 2 (1)                        | 0                   |
|                                        | Treatment naïve<br>With and without cirrhosis<br>With HIV coinfection                  |                            |                     |                                                                              |                     |                              |                     |
| <b>TURQUOISE I Sulkowski JAMA 2015</b> | HCV 1                                                                                  | PTV/r/OBV + DAV + RBV 12 w | 94% (95%CI 79-98)   | NA                                                                           | NA                  | 0                            | NR                  |
|                                        | With HIV coinfection                                                                   | PTV/r/OBV + DAV + RBV 24 w | 91% (95%CI 76-97)   |                                                                              |                     | 0                            |                     |
| <b>ALLY-2 Wyles NEJM</b>               | HCV 1-4                                                                                | DCV + SOF 8w ( TN)         | 76% (95%CI 62 – 87) | NA                                                                           | NA                  | 0                            | 0                   |
|                                        | Treatment naïve                                                                        | DCV + SOF 12w (TN)         | 97% (95%CI 92- 99)  |                                                                              |                     | 1 (1)                        | 0                   |
|                                        | and experienced                                                                        | DCV + SOF 12w (TE)         | 98% (95%CI 90-100)  |                                                                              |                     | 3 (6)                        | 0                   |
|                                        | With HIV co-infection                                                                  |                            |                     |                                                                              |                     |                              |                     |
| <b>ION-4 Naggie NEJM 2015</b>          | HCV 1-4                                                                                | LDV/SOF 12 weeks           | 96% (95%CI 93-98)   | <u>With cirrhosis</u>                                                        | NA                  | 8 (2)                        | 0                   |
|                                        | Treatment naïve and experienced<br>With and without cirrhosis<br>With HIV co-infection |                            |                     | 66% (10/10; CI, 69 -100)<br><u>without cirrhosis</u><br>100% (95%CI 96- 100) |                     |                              |                     |
| <b>ASTRAL 4 Curry NEJM 2015</b>        | HCV 1-6                                                                                | VEL/SOF 12w                | <u>HCV 1a</u>       | <u>HCV 2</u>                                                                 | <u>HCV 4</u>        | 17 (19)                      | 1                   |
|                                        | Decompensated cirrhosis (Child Pugh class B)                                           | VEL/SOF + RBV 12w          | 88% (95%CI 76-96)   | 100% (95%CI 40-100)                                                          | 100% (95%CI 40-100) | 14 (16)                      | 4                   |
|                                        |                                                                                        | VEL/SOF 24w                | 94% (95%CI 85- 99)  | 100% (95%CI 40-100)                                                          | 100% (95%CI 16-100) | 16 (18)                      | 4                   |
|                                        |                                                                                        |                            | 93% (95%CI 82-98)   | 75% (95%CI 19-99)                                                            | 100% (95%CI 16-100) |                              |                     |
|                                        |                                                                                        |                            | <u>HCV 1b</u>       | <u>HCV 3</u>                                                                 | 100% (95%CI 16-100) |                              |                     |
|                                        |                                                                                        |                            | 89% (95%CI 65-99)   | 50% (95%CI 23-77)                                                            |                     |                              |                     |
|                                        |                                                                                        |                            | 100% (95%CI 77-100) | 85% (95%CI 55-98)                                                            |                     |                              |                     |
|                                        |                                                                                        |                            | 88% (95%CI 62-98)   | 50% (95%CI 21-79)                                                            |                     |                              |                     |
|                                        |                                                                                        |                            |                     |                                                                              | <u>HCV 6</u>        |                              |                     |
|                                        |                                                                                        |                            |                     |                                                                              | 0                   |                              |                     |
|                                        |                                                                                        |                            |                     | 0                                                                            |                     |                              |                     |
|                                        |                                                                                        |                            |                     | 100% (95%CI 3-100)                                                           |                     |                              |                     |

|                                              |                                                                               |                       |                     |                        |         |   |
|----------------------------------------------|-------------------------------------------------------------------------------|-----------------------|---------------------|------------------------|---------|---|
| <b>SOLAR-1<br/>Gastroenterology<br/>2015</b> | HCV 1/4<br>Advanced liver<br>disease<br>Pre and post liver<br>transplant      | Pre transplant- CTP B |                     | Only 5 (1%) had HCV GT |         |   |
|                                              |                                                                               | LDV/SOF + RBV 12 w    | 87% (95%CI 72-95)   | 4.                     | 3 (10)  | 0 |
|                                              |                                                                               | LDV/SOF + RBV 24 w    | 89% (95%CI 74-97)   | Data not provided      | 10 (34) | 2 |
|                                              |                                                                               | Pre transplant- CTP C |                     | separately for HCV     |         |   |
|                                              |                                                                               | LDV/SOF + RBV 12 w    | 86% (95%CI 68-96)   | subtypes               | 6 (26)  | 1 |
|                                              |                                                                               | LDV/SOF + RBV 24 w    | 87% (95%CI 70-96)   |                        | 11(42)  | 2 |
|                                              |                                                                               | Post-transplant-      |                     |                        |         |   |
|                                              |                                                                               | No Cirrhosis          |                     |                        |         |   |
|                                              |                                                                               | LDV/SOF + RBV 12 w    | 96% (95%CI 89-99)   |                        | 6 (11)  | 0 |
|                                              |                                                                               | LDV/SOF + RBV 24 w    | 98% (95%CI 92-100)  |                        | 12(21)  | 2 |
|                                              |                                                                               | Post-transplant- CTPA |                     |                        |         |   |
|                                              |                                                                               | LDV/SOF + RBV 12 w    | 96% (95%CI 83-100)  |                        | 3(12)   | 1 |
|                                              |                                                                               | LDV/SOF + RBV 24 w    | 96% (95%CI 82-100)  |                        | 4(16)   | 0 |
|                                              |                                                                               | Post-transplant- CTPB |                     |                        |         |   |
|                                              |                                                                               | LDV/SOF + RBV 12 w    | 85% (95%CI 68-95)   |                        | 5(19)   | 2 |
| LDV/SOF + RBV 24 w                           | 88% (95%CI 73-97)                                                             |                       | 11(42)              | 3                      |         |   |
| Post-transplant- CTPC                        |                                                                               |                       |                     |                        |         |   |
| LDV/SOF + RBV 12 w                           | 60% (95%CI 19-92)                                                             |                       | 1(20)               | 0                      |         |   |
| LDV/SOF + RBV 24 w                           | 75% (95%CI 25-99)                                                             |                       | 3(75)               | 0                      |         |   |
| Post-transplant- FCH                         |                                                                               |                       |                     |                        |         |   |
| LDV/SOF + RBV 12 w                           | 100% (95%CI 47-100)                                                           |                       | 1(25)               | 0                      |         |   |
| LDV/SOF + RBV 24 w                           | 100% (95%CI 22-100)                                                           |                       | 1(25)               | 0                      |         |   |
| <b>SOLAR-2 Lancet<br/>2015</b>               | HCV 1/4<br>advanced liver<br>disease<br>Pre and post liver<br>transplantation | Pre transplant- CTP B | <u>HCV 1</u>        | <u>HCV 4</u>           | 3 (11)  | 1 |
|                                              |                                                                               | LDV/SOF + RBV 12 w    | 87% (95%CI 70-96)   | 67% (95%CI 14-98)      | 6 (21)  | 2 |
|                                              |                                                                               | LDV/SOF + RBV 24 w    | 96% (95%CI 81-100)  | 100% (95%CI 22-100)    |         |   |
|                                              |                                                                               | Pre transplant- CTP C |                     |                        |         |   |
|                                              |                                                                               | LDV/SOF + RBV 12 w    | 85% (95%CI 66-96)   | 0% (95%CI 0-95)        | 13 (52) | 2 |
|                                              |                                                                               | LDV/SOF + RBV 24 w    | 78% (95%CI 60-91)   | 50% (95%CI 3-98)       | 9 (35)  | 5 |
|                                              |                                                                               | Post-transplant-      |                     |                        |         |   |
|                                              |                                                                               | No Cirrhosis          |                     |                        |         |   |
|                                              |                                                                               | LDV/SOF + RBV 12 w    |                     |                        | 9 (17)  | 2 |
|                                              |                                                                               | LDV/SOF + RBV 24 w    | 93% (95%CI 84-98)   | 100% (95%CI 65-100)    | 5 (10)  | 0 |
|                                              |                                                                               | Post-transplant- CTPA | 100% (95%CI 93-100) | 100% (95%CI 55-100)    |         |   |
|                                              |                                                                               | LDV/SOF + RBV 12 w    |                     |                        | 3 (9)   | 0 |
|                                              |                                                                               | LDV/SOF + RBV 24 w    | 100% (95%CI 91-100) | 75% (95%CI 25-99)      | 7 (21)  | 2 |
|                                              |                                                                               | Post-transplant- CTPB | 96% (95%CI 84-100)  | 100% (95%CI 55-100)    |         |   |
|                                              |                                                                               | LDV/SOF + RBV 12 w    |                     |                        | 5 (23)  | 1 |
| LDV/SOF + RBV 24 w                           | 95% (95%CI 78-100)                                                            | 100% (95%CI 22-100)   | 6 (26)              | 0                      |         |   |
| Post-transplant- CTPC                        | 100% (95%CI 86-100)                                                           | 100% (95%CI 37-100)   |                     |                        |         |   |
| LDV/SOF + RBV 12 w                           |                                                                               |                       | 1 (33)              | 1                      |         |   |
| LDV/SOF + RBV 24 w                           | 50% (95%CI 3-98)                                                              | 0% (95%CI 0-95)       | 2 (40)              | 1                      |         |   |
| Post-transplant- FCH                         | 80% (95%CI 34-99)                                                             | -                     |                     |                        |         |   |
| LDV/SOF + RBV 12 w                           |                                                                               |                       | 2 (67)              | 0                      |         |   |
| LDV/SOF + RBV 24 w                           | 100% (95%CI 37-100)                                                           | -                     | 1 (50)              | 0                      |         |   |
|                                              | 100% (95%CI 22-100)                                                           | -                     |                     |                        |         |   |
| <b>CORAL-1<br/>Kwo<br/>NEJM 2014</b>         | HCV 1<br>Post liver transplant<br>12 months prior                             | PTV/r/OBV + DAV + RBV | 97% (95%CI 85-100)  |                        | 2 (6)   | 1 |

|                                                                           |                                                                            |                                                                              |                     |                     |                                  |         |   |
|---------------------------------------------------------------------------|----------------------------------------------------------------------------|------------------------------------------------------------------------------|---------------------|---------------------|----------------------------------|---------|---|
| <b>ALLY-1</b><br><b>Poordad</b><br><b>Hepatology</b>                      | HCV 1-4 and 6<br>Pre and Post<br>Liver transplant                          | Pre Transplant<br>DCV +SOF+ RBV 12w<br>Post-Transplant<br>DCV +SOF + RBV 12w | <u>All patients</u> | <u>HCV 1a</u>       | <u>HCV 3</u>                     | 10(17)  | 1 |
|                                                                           |                                                                            |                                                                              | 83% (95%CI 71-92)   | 76% (26/34)         | 83% (5/6)                        | 5(9)    | 1 |
|                                                                           |                                                                            |                                                                              | 94% (95%CI 84-99)   | 97% (30/31)         | 91% (10/11)                      |         |   |
|                                                                           |                                                                            |                                                                              | <u>HCV1</u>         | <u>HCV 1b</u>       | <u>HCV 4</u>                     |         |   |
|                                                                           |                                                                            |                                                                              | 82% (95%CI 68-92)   | 100 (11/11)         | 100% (4/4)                       |         |   |
|                                                                           |                                                                            |                                                                              | 95% (95%CI 84-99)   | 90% (9/10)          | 0                                |         |   |
|                                                                           |                                                                            |                                                                              |                     | <u>HCV 2</u>        | <u>HCV 6</u>                     |         |   |
|                                                                           |                                                                            |                                                                              |                     | 80% (4/5)           | 0                                |         |   |
|                                                                           |                                                                            |                                                                              |                     | 0                   | 100% (1/1)                       |         |   |
| <b>C-SURFER</b><br><b>Roth</b><br><b>Lancet 2015</b>                      | HCV 1<br>Treatment naïve<br>With and without<br>cirrhosis<br>CKD stage 4-5 | GZP/EBV 12w<br>Placebo 12 w to GZP + ELB<br>12w                              | NR                  | <u>HCV1a</u>        | <u>In cirrhotic patients</u>     | 16 (15) | 0 |
|                                                                           |                                                                            |                                                                              |                     | 100% (95%CI 94-100) | 100% (95%CI 54-100)              | 19 (17) | 5 |
|                                                                           |                                                                            |                                                                              |                     | <u>HCV1b</u>        | <u>In non-cirrhotic patients</u> |         |   |
|                                                                           |                                                                            |                                                                              |                     | 98% (95%CI 90-100)  | 99% (95%CI 95-100)               |         |   |
|                                                                           |                                                                            |                                                                              |                     |                     | NA                               |         |   |
| <b>RUBY-1</b><br><b>Pockros</b><br><b>Gastroenterology</b><br><b>2016</b> | HCV 1<br>Treatment naïve<br>Without cirrhosis<br>CKD stage 4-5             | HCV 1a<br>PTV/r/OBV/ DAV + RBV<br>12w<br>HCV 1b<br>PTV/r/ OBV + DAV 12w      | NR                  | <u>HCV1a</u>        |                                  | 3 (23)  | 0 |
|                                                                           |                                                                            |                                                                              |                     | 85% (11/13) (+ RBV) |                                  | 1 (14)  | 0 |
|                                                                           |                                                                            |                                                                              |                     | <u>HCV1b</u>        |                                  |         |   |
|                                                                           |                                                                            |                                                                              |                     | 100% (7/7) (- RBV)  |                                  |         |   |

**Table 7: Ongoing and Future Hepatitis C Oral DAA Clinical Trials**

| <b>Study</b>                                                                                                                                                                                                                            | <b>Planned Study Population</b>                                                         | <b>Size</b> | <b>Start date</b> | <b>Estimated Primary Completion date</b> | <b>Main outcome</b>                                                                 |
|-----------------------------------------------------------------------------------------------------------------------------------------------------------------------------------------------------------------------------------------|-----------------------------------------------------------------------------------------|-------------|-------------------|------------------------------------------|-------------------------------------------------------------------------------------|
| <b>HCV Genotype 3<br/>Efficacy and Safety of Sofosbuvir/ Velpatasvir Fixed Dose Combination (FDC) and Sofosbuvir/ Velpatasvir FDC and Ribavirin in Participants With Chronic Genotype 3 HCV Infection and Cirrhosis<br/>NCT02781558</b> | HCV genotype 3 and compensated cirrhosis                                                | 200         | July 2016         | March 2017                               | SVR 12<br>Proportion who permanently discontinue study drug due to an adverse event |
| <b>Safety and Efficacy of SOF/VEL/VOX FDC for 8 Weeks and SOF/VEL for 12 Weeks in Adults Chronic Genotype 3 HCV Infection and Cirrhosis<br/>NCT02639338</b>                                                                             | HCV genotype 3<br>Treatment naïve or experienced<br>With Cirrhosis                      | 220         | December 2015     | October 2016                             | SVR 12<br>Proportion who permanently discontinue study drug due to an adverse event |
| <b>HCV Genotype 2<br/>Efficacy and Safety of ABT-493/ABT-530 in Adults With Chronic Hepatitis C Virus (HCV) Genotype 2 Infection (ENDURANCE-2)<br/>NCT02640482</b>                                                                      | Treatment naïve or experienced<br>HCV genotype 2<br>Non-cirrhotic                       | 321         | November 2015     | September 2016                           | SVR 12                                                                              |
| <b>HCV Genotype 4, 5 and 6<br/>A Study of Glecaprevir/Pibrentasvir in Adults With Chronic Hepatitis C Virus (HCV) Genotype 5 or 6 Infection<br/>Non-cirrhotic x 8 weeks<br/>Cirrhotic x 12 weeks<br/>NCT02966795</b>                    | Treatment naïve or experienced<br>With or without cirrhosis                             | 80          | December 2016     | January 2018                             | SVR 12                                                                              |
| <b>Efficacy and Safety of ABT-493/ABT-530 in Adults With Chronic Hepatitis C Virus Genotype 4, 5, or 6 Infection (ENDURANCE-4)<br/>NCT02636595</b>                                                                                      | Treatment naïve or experienced<br>Genotype 4, 5 or 6<br>Non-cirrhotic                   | 130         | November 2015     | October 2016                             | SVR 12                                                                              |
| <b>HCV Genotypes 1-6<br/>Efficacy and Safety of ABT-493/ABT-530 in Adults With Chronic Hepatitis C Virus Genotype 1, 2, 4, 5 or 6 Infection and Compensated Cirrhosis (EXPEDITION-1)<br/>NCT02642432</b>                                | HCV genotype 1,2, 4, 5 and 6<br>Treatment naïve or experienced<br>Compensated Cirrhosis | 175         | December 2015     | October 2016                             | SVR 12                                                                              |
| <b>Safety and Efficacy of Sofosbuvir/Velpatasvir/ Voxilaprevir and Sofosbuvir/Velpatasvir in Adults With Chronic HCV Infection Who Have Not Previously Received Treatment With Direct-Acting Antiviral Therapy</b>                      | HCV infection<br>Treatment naïve or experienced with an interferon (IFN)-based regimen  | 943         | November 2015     | October 2016                             | SVR 12<br>Proportion who permanently discontinue study drug                         |



|                                                                                                                                                                                                                                                                   |                                                                                                                      |     |                |              |                                                                                     |
|-------------------------------------------------------------------------------------------------------------------------------------------------------------------------------------------------------------------------------------------------------------------|----------------------------------------------------------------------------------------------------------------------|-----|----------------|--------------|-------------------------------------------------------------------------------------|
| <b>(POLARIS-2)</b><br><b>NCT02607800</b><br><b>Efficacy and Safety of Experimental Drugs ABT-493/ABT-530 in Adults With Chronic Hepatitis C Virus Genotype 1-6 Infection and Human Immunodeficiency Virus -1 Coinfection (EXPEDITION-2)</b><br><b>NCT02738138</b> | HCV GT 1-6<br>Treatment naïve or experienced<br>HIV infected<br>ART naïve CD4 >500<br>On stable ART CD4 >200         | 160 | May 2016       | January 2017 | due to an adverse event<br>SVR 12                                                   |
| <b>Efficacy and Safety of MK-3682 + Ruzasvir (MK-8408) x 12 weeks</b><br><b>NCT02956629</b>                                                                                                                                                                       | HCV Genotypes 1-6<br>Treatment naïve and experienced<br>With and without cirrhosis<br>With and without HIV infection | 250 | November 2016  | August 2017  | SVR 12                                                                              |
| <b>Efficacy and Safety of Combinations of AL-335, Odalasvir (ODV) and Simeprevir (SMV) in the Treatment of Chronic Hepatitis C Infection</b><br><b>NCT02765490</b><br><b>Chronic Kidney Disease</b>                                                               | HCV genotype 1, 2, 4, 5 or 6<br>infected subjects without cirrhosis                                                  | 300 | November 2015  | August 2016  | SVR 12                                                                              |
| <b>Efficacy and Safety of ABT-493/ABT-530 in Renally Impaired Adults With Chronic Hepatitis C Virus Genotype 1 - 6 Infection (EXPEDITION-4)</b><br><b>NCT02651194</b>                                                                                             | HCV genotypes 1-6<br>Treatment naïve or experienced<br>With underlying chronic renal impairment                      | 100 | December 2015  | October 2016 | SVR 12                                                                              |
| <b>Decompensated Cirrhosis</b><br><b>Efficacy and Safety of Sofosbuvir/ Velpatasvir ± Ribavirin for 12 Weeks in Adults With Chronic HCV Infection and Decompensated Cirrhosis</b><br><b>NCT02996682</b>                                                           | HCV infection<br>CTP Class C                                                                                         | 100 | December 2016  | March 2018   | SVR 12<br>Proportion who permanently discontinue study drug due to an adverse event |
| <b>Post liver transplant</b><br><b>Pilot Study to Evaluate Efficacy of Grazoprevir + Elbasvir for 12 or 16 Weeks in Liver Transplant Recipients. (EGRADICATE)</b><br><b>NCT02890719</b>                                                                           | Genotype 1 and 4<br>Treatment naïve or experienced<br>Post liver transplant                                          | 30  | September 2016 | May 2018     | SVR 12                                                                              |
| <b>Sofosbuvir/Velpatasvir Fixed Dose Combination in Participants With Chronic Hepatitis C Virus Infection Who Have Received a Liver Transplant</b><br><b>NCT02781571</b>                                                                                          | HCV genotype 1, 2, 3, 4, 5, 6, or indeterminate<br>≥ 3 months post-liver transplant with chronic HCV reoccurrence    | 80  | July 2016      | March 2017   | SVR 12<br>Proportion who permanently discontinue study drug due to an adverse event |
| <b>Safety and Efficacy of ABT-493/ABT-530 in Adult Post-Liver or Post-Renal Transplant Recipients With Chronic Hepatitis C Virus (MAGELLAN-2)</b>                                                                                                                 | Post liver/renal transplant<br>HCV Genotypes 1-6                                                                     | 90  | April 2016     | March 2017   | SVR 12                                                                              |

|                                                                                                                                                                                                                                                                                                      |                                                                                                                                              |     |               |               |                                                                                     |
|------------------------------------------------------------------------------------------------------------------------------------------------------------------------------------------------------------------------------------------------------------------------------------------------------|----------------------------------------------------------------------------------------------------------------------------------------------|-----|---------------|---------------|-------------------------------------------------------------------------------------|
| <b>NCT02692703</b><br><b>HIV Co-infection</b><br><b>Efficacy and Safety of Experimental Drugs ABT-493/ABT-530 in Adults With Chronic Hepatitis C Virus Genotype 1-6 Infection and Human Immunodeficiency Virus -1 Coinfection (EXPEDITION-2)</b><br><b>NCT02738138</b>                               | HCV GT 1-6<br>Treatment naïve or experienced<br>HIV infected<br>ART naïve CD4 >500<br>On stable ART CD4 >200                                 | 160 | May 2016      | January 2017  | SVR 12                                                                              |
| <b>Oral Direct Acting Agent Failures</b><br><b>Safety and Efficacy of Sofosbuvir/Velpatasvir/Voxilaprevir Fixed-Dose Combination With or Without Ribavirin in Participants With Chronic Genotype 1 HCV Infection Previously Treated With a Direct Acting Antiviral Regimen</b><br><b>NCT02536313</b> | HCV genotype 1<br>Treatment experienced with oral direct acting agent                                                                        | 49  | July 2015     | March 2016    | SVR 12<br>Proportion who permanently discontinue study drug due to an adverse event |
| <b>Safety and Efficacy of Sofosbuvir/Velpatasvir/Voxilaprevir in Adults With Chronic HCV Infection Who Have Previously Received Treatment With Direct-Acting Antiviral Therapy (POLARIS-1)</b><br><b>NCT02607735</b>                                                                                 | HCV infection<br>Treatment experienced with oral direct acting agent                                                                         | 416 | November 2015 | October 2016  | SVR 12<br>Proportion who permanently discontinue study drug due to an adverse event |
| <b>Safety, Tolerability and Efficacy of Sofosbuvir, Velpatasvir, and GS-9857 for 12 weeks in Subjects With Previous DAA Experience</b><br><b>NCT02745535</b>                                                                                                                                         | GT 1a and b<br>With and without Previously failed Viekira Pak or Harvoni                                                                     | 120 | March 2016    | December 2016 | SVR 12<br>Grade 3 and 4 adverse events                                              |
| <b>Efficacy and Safety of MK-3682B (MK-5172 + MK-3682 + MK-8408) Fixed Dose Combination in Chronic HCV Participants Failing Prior Antiviral Treatment (MK-3682-021)</b><br><b>NCT02613403</b>                                                                                                        | HCV GT1 or GT3 Who Have Failed a Direct Acting Antiviral Regimen                                                                             | 200 | December 2015 | June 2018     | SVR 12                                                                              |
| <b>Safety and Efficacy of SOF/VEL/VOX FDC for 12 Weeks and SOF/VEL for 12 Weeks in DAA-Experienced Adults With Chronic HCV Infection Who Have Not Received an NS5A Inhibitor</b><br><b>NCT02639247</b>                                                                                               | Chronic HCV infection (≥ 6 months)<br>Treatment experienced with a direct acting antiviral medication not including a NS5A Inhibitor for HCV | 333 | December 2015 | October 2016  | SVR 12<br>Proportion who permanently discontinue study drug due to an adverse event |

**Table 8: Risk of bias assessment based on the Cochrane Risk of Bias tool for Randomized Controlled Trials**

| Study                   | Sequence generation | Allocation scheme concealed | Blinding | Incomplete outcome data | Selective reporting | Other biases | Overall Risk of Bias |
|-------------------------|---------------------|-----------------------------|----------|-------------------------|---------------------|--------------|----------------------|
| LONE STAR               | Low                 | Low                         | Low      | Low                     | Low                 | Low          | Low                  |
| ION-1                   | Unclear             | Unclear                     | High     | Low                     | Low                 | Low          | Moderate             |
| ION-2                   | Unclear             | Unclear                     | High     | Low                     | Low                 | Low          | Moderate             |
| ION-3                   | Low                 | Unclear                     | Unclear  | Low                     | Low                 | Low          | Moderate             |
| SIRIUS                  | Low                 | Low                         | Low      | Low                     | Low                 | Low          | Low                  |
| Pearl II                | Low                 | Low                         | Low      | Low                     | Low                 | Low          | Low                  |
| Pearl III               | Low                 | Low                         | Low      | Low                     | Low                 | Low          | Low                  |
| Pearl IV                | Low                 | Low                         | Low      | Low                     | Low                 | Low          | Low                  |
| Sapphire I              | Low                 | Low                         | Low      | Low                     | Low                 | Low          | Low                  |
| Sapphire II             | Low                 | Low                         | Low      | Low                     | Low                 | Low          | Low                  |
| Turquoise II            | Unclear             | Unclear                     | Unclear  | Low                     | Low                 | Low          | Moderate             |
| Pearl I<br>Hezode       | Low                 | Low                         | High     | Low                     | Low                 | Low          | Low                  |
| Pearl I<br>Lawitz       | High                | High                        | High     | Low                     | Low                 | Low          | Moderate             |
| Cosmos                  | Low                 | Low                         | High     | Low                     | High                | Low          | Moderate             |
| ASTRAL-1                | Low                 | Low                         | Low      | Low                     | Low                 | Low          | Low                  |
| ASTRAL 2                | Low                 | Low                         | High     | Low                     | Low                 | Low          | Low                  |
| ASTRAL 3                | Low                 | Low                         | High     | Low                     | Low                 | Low          | Low                  |
| ASTRAL 4                | Unclear             | Unclear                     | High     | Low                     | High                | Low          | Moderate             |
| C-EDGE<br>Zeuzem        | Low                 | Low                         | Low      | Low                     | High                | Low          | Moderate             |
| C-WORTHY<br>Lawitz      | Low                 | Low                         | High     | Low                     | High                | Low          | Moderate             |
| C-WORTHY<br>Sulkowski   | Low                 | Low                         | Low      | Low                     | Low                 | Low          | Low                  |
| TURQUOISEI<br>Sulkowski | Low                 | Low                         | High     | Low                     | Low                 | Low          | Low                  |
| C-SURFER<br>Roth        | Low                 | Low                         | Low      | Low                     | Low                 | Low          | Low                  |
| OPTIMIST-1              | Low                 | High                        | High     | Low                     | Low                 | Low          | Low                  |
| Gane                    | Low                 | Low                         | High     | Low                     | Low                 | Low          | Low                  |

---

|           |         |         |      |     |      |     |          |
|-----------|---------|---------|------|-----|------|-----|----------|
| AI444040  | Low     | Unclear | High | Low | High | Low | Moderate |
| SOLAR 1   | Low     | Low     | Low  | Low | Low  | Low | Low      |
| SOLAR 2   | Low     | Low     | Low  | Low | Low  | Low | Low      |
| ALLY 2    | Unclear | Unclear | High | Low | Low  | Low | Moderate |
| ALLY3plus | Unclear | Unclear | High | Low | Low  | Low | Moderate |
| C-EDGE-TE | Low     | Low     | High | Low | low  | Low | Low      |
| OSIRIS    | Unclear | Unclear | High | Low | Low  | Low | Moderate |

---

**Table 9: Risk of bias assessment based on Cochrane tool for assessment of the risk of bias in nonrandomized trials and observational studies**

| Study                | Bias due to confounding | Bias in selection of participants into the study | Bias in measurement of interventions | Bias due to departures from intended interventions | Bias due to missing data | Bias in measurement of outcomes | Bias in selection of the reported result | Overall Risk of Bias |
|----------------------|-------------------------|--------------------------------------------------|--------------------------------------|----------------------------------------------------|--------------------------|---------------------------------|------------------------------------------|----------------------|
| C-EDGE<br>Rockstrohm | N/A                     | N/A                                              | Low                                  | Low                                                | Low                      | Low                             | low                                      | Moderate             |
| OPTIMIST 2           | N/A                     | N/A                                              | Low                                  | Low                                                | Low                      | Low                             | low                                      | Moderate             |
| ALLY-1               | N/A                     | N/A                                              | Low                                  | Low                                                | Low                      | Low                             | low                                      | Moderate             |
| ALLY-3               | N/A                     | N/A                                              | Low                                  | Low                                                | Low                      | Low                             | low                                      | Moderate             |
| ION-4                | N/A                     | N/A                                              | Low                                  | Low                                                | Low                      | Low                             | low                                      | Moderate             |
| Kohli                | N/A                     | N/A                                              | Low                                  | Low                                                | Low                      | Low                             | low                                      | Moderate             |
| Abergel<br>GT 5      | N/A                     | N/A                                              | Low                                  | Low                                                | Low                      | Low                             | low                                      | Moderate             |
| Ruby 1               | N/A                     | N/A                                              | Low                                  | Low                                                | Low                      | Low                             | low                                      | Moderate             |
| Coral 1              | N/A                     | N/A                                              | Low                                  | Low                                                | Low                      | Low                             | low                                      | Moderate             |
| Abergel<br>GT 4      | N/A                     | N/A                                              | Low                                  | Low                                                | Low                      | Low                             | Low                                      | Moderate             |
